# Supplementary material for: Tuning the nuclearity of [Mo2O2S2]2+-based assemblies by playing with the degree of flexibility of bis-thiosemicarbazone ligands
Source: Royal Society of Chemistry journal article supplement (doi:10.1039/d2dt03760b), 2023-01-01
Supplement: d2dt03760b1.pdf [file d2dt03760b1.pdf]

## Tuning the nuclearity of $[\text{Mo}_2\text{O}_2\text{S}_2]^{2+}$ -based assemblies by playing with the degree of flexibility of bis-thiosemicarbazones ligands

Diana Cebotari,<sup>a,b</sup> Sergiu Calancea,<sup>a</sup> Jérôme Marrot,<sup>a</sup> Régis Guillot,<sup>c</sup> Clément Falaise,<sup>a</sup> Vincent Guérineau,<sup>d</sup> David Touboul,<sup>d</sup> Mohamed Haouas,<sup>a</sup> Aurelian Gulea,<sup>\*b</sup> and Sébastien Floquet<sup>\*a</sup>

<sup>a</sup>Institut Lavoisier de Versailles, CNRS, UVSQ, Université Paris-Saclay, 45 av. des Etats-Unis,  
78035 Versailles, France

<sup>b</sup>State University of Moldova, 60 Alexei Mateevici str., MD-2009 Chisinau,  
Republic of Moldova

<sup>c</sup>Institut de Chimie Moléculaire et des Matériaux d'Orsay, ICMMO, CNRS UMR 8182,  
Université Paris Saclay, 91405 Orsay Cedex, France

<sup>d</sup>Institut de Chimie des Substances Naturelles, CNRS UPR2301, Université Paris-Sud,  
Université Paris-Saclay, Avenue de la Terrasse, 91198 Gif-sur-Yvette Cedex, France

Correspondence author: [sebastien.floquet@uvsq.fr](mailto:sebastien.floquet@uvsq.fr)

## Supporting Information

## Contents

### Part 1 : MALDI-TOF Spectra.

Pages S2-S5

**Figure S1** MALDI-TOF spectrum for  $[\text{Mo}_2\text{O}_2\text{S}_2(\text{L}^2)]$  complex

**Figure S2** MALDI-TOF spectrum for  $[\text{Mo}_2\text{O}_2\text{S}_2(\text{L}^3)]$  complex

**Figure S3** MALDI-TOF spectrum for  $[(\text{Mo}_2\text{O}_2\text{S}_2)_2(\text{L}^4)_2]$  complex

**Figure S4** MALDI-TOF spectrum for  $[(\text{Mo}_2\text{O}_2\text{S}_2)_2(\text{L}^5)_2]$  complex

**Figure S5** MALDI-TOF spectrum for  $[(\text{Mo}_2\text{O}_2\text{S}_2)_2(\text{L}^6)_2]$  complex

### Part 2 : X-Ray Diffraction. Crystal packings.

Pages S6-S14

**Tables S1-S2:** Crystallographic data.

**Table S3:** Selected angles ( $^\circ$ ) and distances ( $\text{\AA}$ ) in the complexes

**Figure S6.** Crystal packing of  $[\text{Mo}_2\text{O}_2\text{S}_2(\text{L}_1)]$  complex

**Figure S7** Crystal packing of  $[\text{Mo}_2\text{O}_2\text{S}_2(\text{L}^2)]$  complex.

**Figure S8** Crystal packing of  $[\text{Mo}_2\text{O}_2\text{S}_2(\text{L}^3)]$  complex.

**Figure S9** Crystal packing of  $[(\text{Mo}_2\text{O}_2\text{S}_2)_2(\text{L}^4)_2]$  complex.

**Figure S10** Intermolecular S...O, S...S and N...H interactions in  $[(\text{Mo}_2\text{O}_2\text{S}_2)_2(\text{L}^4)_2]$ .

**Figure S11** Intermolecular NH...O hydrogen bonding in  $[(\text{Mo}_2\text{O}_2\text{S}_2)_2(\text{L}^4)_2]$  involving amino groups and DMF molecules.

**Figure S12** Crystal packing of  $[(\text{Mo}_2\text{O}_2\text{S}_2)_2(\text{L}^5)_2]$  complex.

**Figure S13** Intermolecular NH...O hydrogen bonding in  $[(\text{Mo}_2\text{O}_2\text{S}_2)_2(\text{L}^5)_2]$  involving amino groups and DMF and EtOH molecules.

**Figure S14** Crystal packing of  $[(\text{Mo}_2\text{O}_2\text{S}_2)_2(\text{L}^6)_2]$  complex

**Figure S15** Intermolecular NH...O hydrogen bonding in  $[(\text{Mo}_2\text{O}_2\text{S}_2)_2(\text{L}^6)_2]$  involving amino groups and DMF molecules.

### Part 3 : NMR Spectra

Pages S15-S33

**Figure S16**  $^{15}\text{N}\{^1\text{H}\}$  NMR HMBC spectrum for  $\text{H}_2\text{L}^1$  ligand

**Figure S17**  $^{15}\text{N}\{^1\text{H}\}$  NMR HMBC spectrum for  $\text{H}_2\text{L}^4$  ligand

**Figure S18**  $^1\text{H}$ -NMR spectra of  $\text{H}_2\text{L}^2$  and  $[\text{Mo}_2\text{O}_2\text{S}_2(\text{L}^2)]$  complex

**Figure S19**  $^1\text{H}$ -NMR DOSY spectrum for  $\text{H}_2\text{L}^2$  ligand

**Figure S20**  $^{15}\text{N}\{^1\text{H}\}$  NMR HMBC spectrum for  $\text{H}_2\text{L}^2$  ligand

**Figure S21**  $^1\text{H}$ -NMR DOSY spectra for  $\text{H}_2\text{L}^2$  and  $[\text{Mo}_2\text{O}_2\text{S}_2(\text{L}^2)]$  complex

**Figure S22**  $^1\text{H}$ -NMR spectra of  $\text{H}_2\text{L}^3$  and  $[\text{Mo}_2\text{O}_2\text{S}_2(\text{L}^3)]$  complex

**Figure S23**  $^{15}\text{N}\{^1\text{H}\}$  NMR HMBC spectrum for  $\text{H}_2\text{L}^3$  ligand

**Figure S24**  $^{15}\text{N}\{^1\text{H}\}$  NMR HMBC spectrum for  $[\text{Mo}_2\text{O}_2\text{S}_2(\text{L}^3)]$  complex

**Figure S25**  $^1\text{H}$ -NMR DOSY spectra for  $\text{H}_2\text{L}^2$  and  $[\text{Mo}_2\text{O}_2\text{S}_2(\text{L}^3)]$  complex

**Figure S26**  $^1\text{H}$ -NMR spectra of  $\text{H}_2\text{L}^5$  and  $[(\text{Mo}_2\text{O}_2\text{S}_2)_2(\text{L}^5)_2]$  complex

**Figure S27**  $^{15}\text{N}\{^1\text{H}\}$  NMR HMBC spectrum for  $\text{H}_2\text{L}^5$

**Figure S28**  $^{15}\text{N}\{^1\text{H}\}$  NMR HMBC spectrum for  $[(\text{Mo}_2\text{O}_2\text{S}_2)_2(\text{L}^5)_2]$  complex

**Figure S29**  $^1\text{H}$ -NMR DOSY spectra for  $\text{H}_2\text{L}^5$  and  $[(\text{Mo}_2\text{O}_2\text{S}_2)_2(\text{L}^5)_2]$  complex

**Figure S30**  $^1\text{H}$ -NMR spectra of  $\text{H}_2\text{L}^6$  and  $[(\text{Mo}_2\text{O}_2\text{S}_2)_2(\text{L}^6)_2]$  complex

**Figure S31**  $^{15}\text{N}\{^1\text{H}\}$  NMR HMBC spectrum for  $\text{H}_2\text{L}^6$  ligand

**Figure S32**  $^1\text{H}$ -NMR DOSY spectra for  $\text{H}_2\text{L}^6$  and  $[(\text{Mo}_2\text{O}_2\text{S}_2)_2(\text{L}^6)_2]$  complex

## Part 1 : MALDI-TOF Spectra

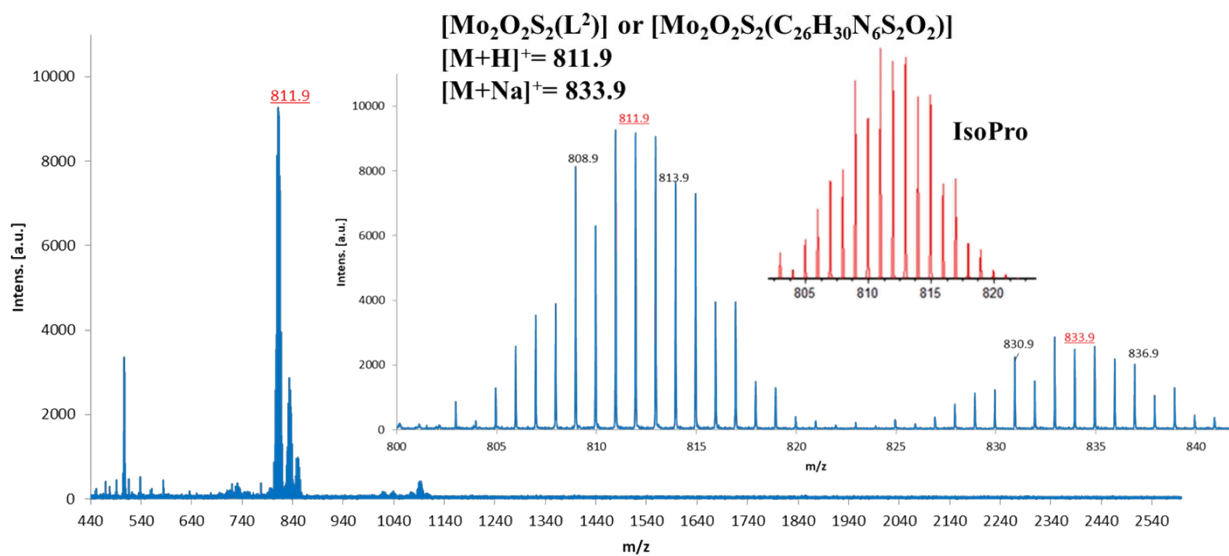

Figure S1 MALDI-TOF spectrum for  $[\text{Mo}_2\text{O}_2\text{S}_2(\text{L}^2)]$  complex

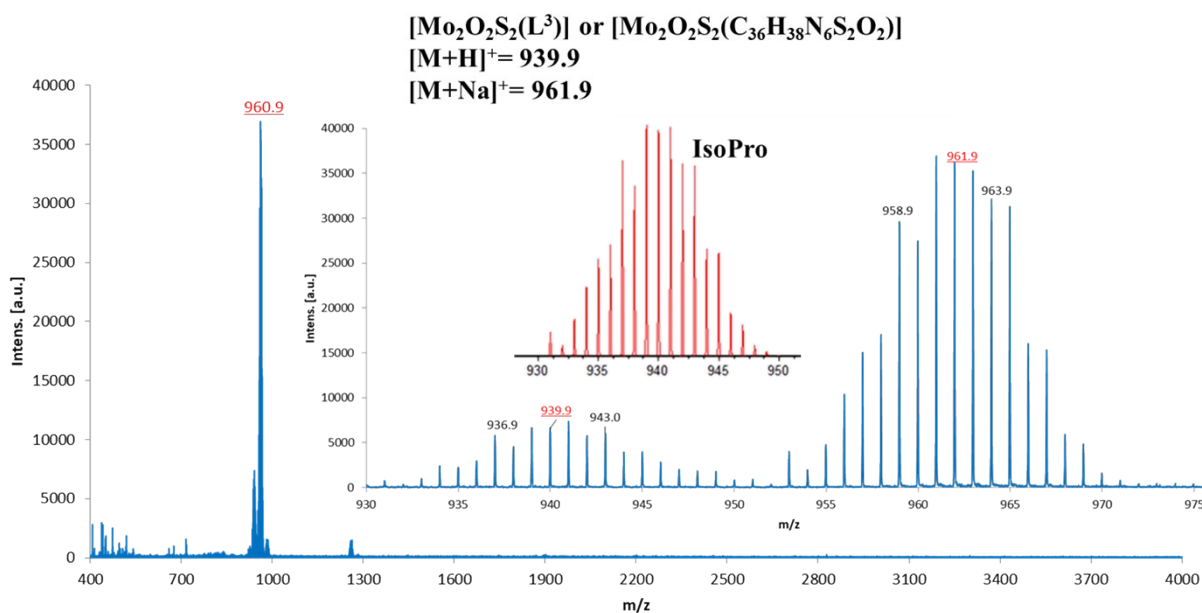

Figure S2 MALDI-TOF spectrum for  $[\text{Mo}_2\text{O}_2\text{S}_2(\text{L}^3)]$  complex

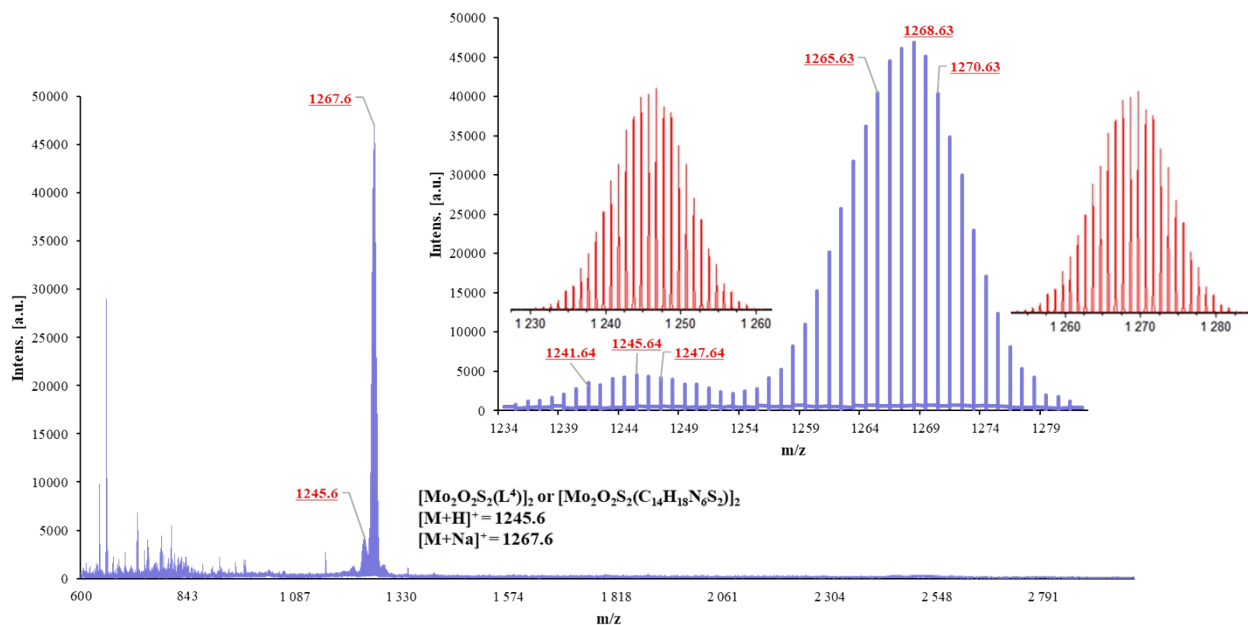

**Figure S3** MALDI-TOF spectrum for  $[(\text{Mo}_2\text{O}_2\text{S}_2)_2(\text{L}^4)]_2$  complex

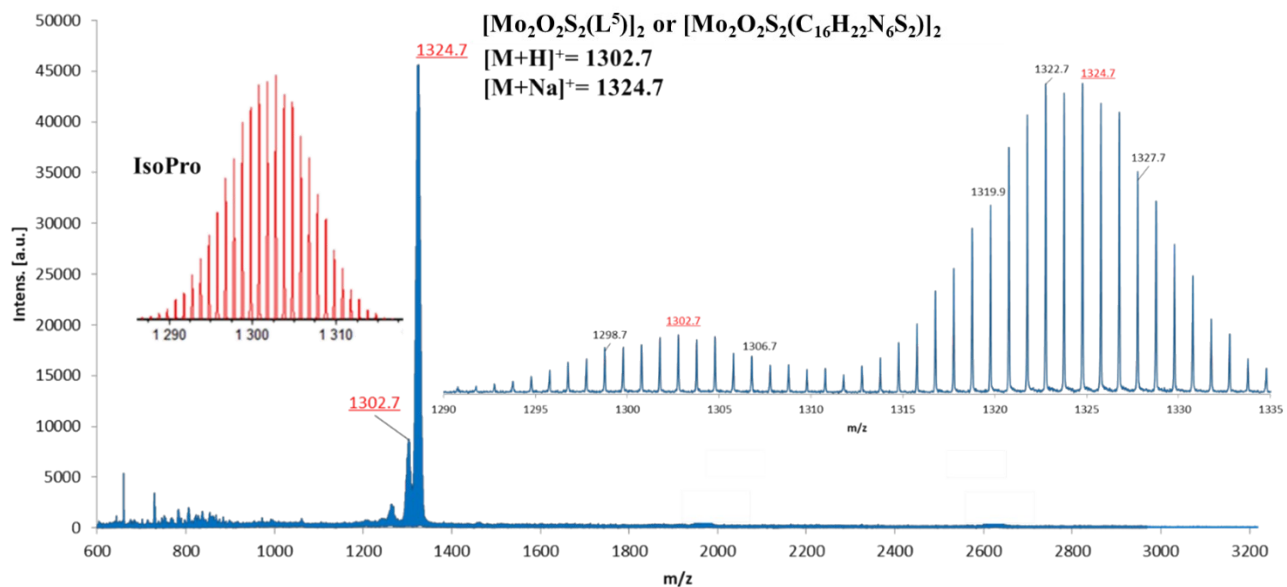

**Figure S4** MALDI-TOF spectrum for  $[(\text{Mo}_2\text{O}_2\text{S}_2)_2(\text{L}^5)]_2$  complex

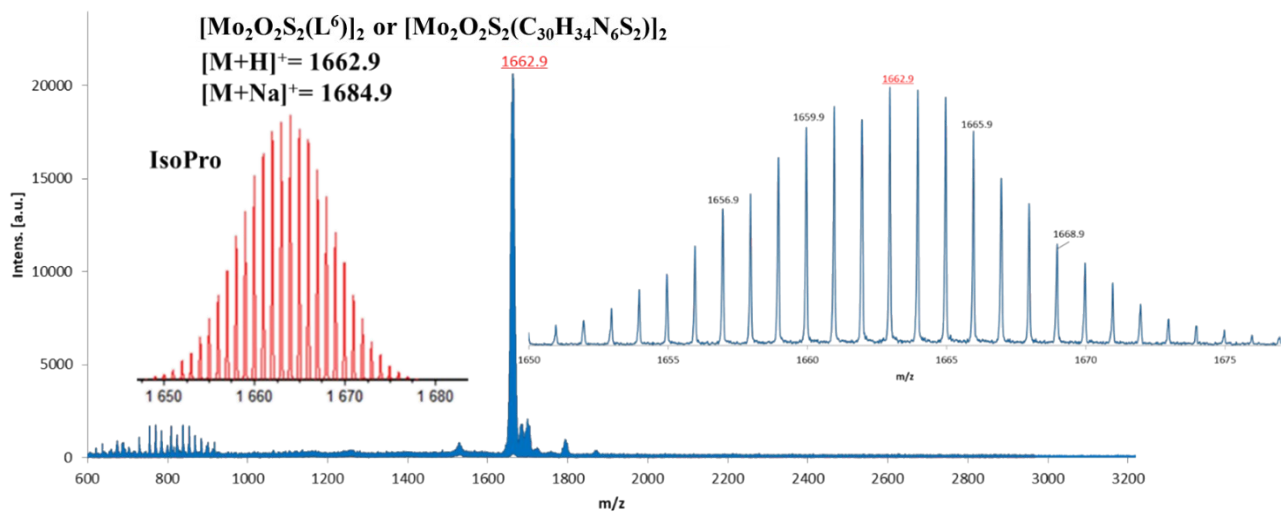

**Figure S5** MALDI-TOF spectrum for  $[(\text{Mo}_2\text{O}_2\text{S}_2)_2(\text{L}^6)_2]$  complex

## Part 2 : X-Ray Diffraction

**Table S1.** Crystallographic data for complexes [Mo<sub>2</sub>O<sub>2</sub>S<sub>2</sub>(L<sup>1</sup>)], [Mo<sub>2</sub>O<sub>2</sub>S<sub>2</sub>(L<sup>2</sup>)] and [Mo<sub>2</sub>O<sub>2</sub>S<sub>2</sub>(L<sup>3</sup>)]

| Complex                                      | [Mo <sub>2</sub> O <sub>2</sub> S <sub>2</sub> (L <sup>1</sup> )]                            | [Mo <sub>2</sub> O <sub>2</sub> S <sub>2</sub> (L <sup>2</sup> )]                            | [Mo <sub>2</sub> O <sub>2</sub> S <sub>2</sub> (L <sup>3</sup> )]                            |
|----------------------------------------------|----------------------------------------------------------------------------------------------|----------------------------------------------------------------------------------------------|----------------------------------------------------------------------------------------------|
| Formula                                      | C <sub>26</sub> H <sub>36</sub> Mo <sub>2</sub> N <sub>8</sub> O <sub>6</sub> S <sub>4</sub> | C <sub>35</sub> H <sub>51</sub> Mo <sub>2</sub> N <sub>9</sub> O <sub>7</sub> S <sub>4</sub> | C <sub>39</sub> H <sub>47</sub> Mo <sub>2</sub> N <sub>6</sub> O <sub>6</sub> S <sub>4</sub> |
| M (g mol <sup>-1</sup> )                     | 876.75                                                                                       | 1029.97                                                                                      | 1015.94                                                                                      |
| Temperature                                  | 210                                                                                          | 150                                                                                          | 210                                                                                          |
| Crystal system                               | Orthorhombic                                                                                 | Triclinic                                                                                    | Triclinic                                                                                    |
| Space group                                  | <i>Pbca</i>                                                                                  | <i>P</i> -1                                                                                  | <i>P</i> 1                                                                                   |
| <i>a</i> (Å)                                 | 14.4020(4)                                                                                   | 9.8604(4)                                                                                    | 11.2201(6)                                                                                   |
| <i>b</i> (Å)                                 | 18.8426(5)                                                                                   | 11.8441(5)                                                                                   | 12.1164(6)                                                                                   |
| <i>c</i> (Å)                                 | 27.1560(8)                                                                                   | 21.7263(9)                                                                                   | 18.3239(9)                                                                                   |
| $\alpha$ (°)                                 | 90                                                                                           | 74.869(2)                                                                                    | 76.257(2)                                                                                    |
| $\beta$ (°)                                  | 90                                                                                           | 79.023(2)                                                                                    | 87.948(2)                                                                                    |
| $\gamma$ (°)                                 | 90                                                                                           | 65.735(2)                                                                                    | 88.316(2)                                                                                    |
| V (Å <sup>3</sup> )                          | 7369.4(4)                                                                                    | 2223.01(16)                                                                                  | 2417.7(2)                                                                                    |
| Z                                            | 8                                                                                            | 2                                                                                            | 2                                                                                            |
| D <sub>calc</sub>                            | 1.580                                                                                        | 1.539                                                                                        | 1.396                                                                                        |
| Crystal size (mm)                            | 0.30 × 0.20 × 0.06                                                                           | 0.31 × 0.17 × 0.14                                                                           | 0.20 × 0.12 × 0.04                                                                           |
| F(000)                                       | 3552                                                                                         | 1056                                                                                         | 1038                                                                                         |
| $\mu$ (Mo-K $\alpha$ )/mm <sup>-1</sup>      | 0.71073                                                                                      | 0.71073                                                                                      | 0.71073                                                                                      |
| Reflections collected                        | 486382                                                                                       | 112483                                                                                       | 158731                                                                                       |
| Independent reflections ( $I > 2\sigma(I)$ ) | 10137                                                                                        | 17397                                                                                        | 11937                                                                                        |
| Parameters                                   | 419                                                                                          | 520                                                                                          | 563                                                                                          |
| $\Delta(\rho)$ (e Å <sup>-3</sup> )          | 0.48 and -0.46                                                                               | 1.379 and -0.947                                                                             | 1.70 and -0.61                                                                               |
| Goodness of fit                              | 1.14                                                                                         | 1.212                                                                                        | 1.11                                                                                         |
| R1 <sup>a</sup>                              | 0.0215 (0.024) <sup>b</sup>                                                                  | 0.0289 (0.0363)                                                                              | 0.0333 (0.0434)                                                                              |
| wR2 <sup>a</sup>                             | 0.0509 (0.0526)                                                                              | 0.0579 (0.0625)                                                                              | 0.0974 (0.107)                                                                               |

<sup>a</sup>R =  $\sum||F_o| - |F_c||/\sum|F_o|$ , wR<sub>2</sub> =  $[\sum w(F_o^2 - F_c^2)^2/\sum w(F_o^2)^2]^{1/2}$ ; [F<sub>o</sub> > 4 $\sigma$ (F<sub>o</sub>)]. <sup>b</sup>Based on all data.

**Table S2** Crystallographic data for complexes  $[(\text{Mo}_2\text{O}_2\text{S}_2)_2(\text{L}^4)_2]$ ,  $[(\text{Mo}_2\text{O}_2\text{S}_2)_2(\text{L}^5)_2]$  and  $[(\text{Mo}_2\text{O}_2\text{S}_2)_2(\text{L}^6)_2]$ 

| Complex                                      | $[(\text{Mo}_2\text{O}_2\text{S}_2)_2(\text{L}^4)_2]$                       | $[(\text{Mo}_2\text{O}_2\text{S}_2)_2(\text{L}^5)_2]$                                | $[(\text{Mo}_2\text{O}_2\text{S}_2)_2(\text{L}^6)_2]$                                |
|----------------------------------------------|-----------------------------------------------------------------------------|--------------------------------------------------------------------------------------|--------------------------------------------------------------------------------------|
| Formula                                      | $\text{C}_{40}\text{H}_{64}\text{Mo}_4\text{N}_{16}\text{O}_{9.50}\text{S}$ | $\text{C}_{41.50}\text{H}_{67.50}\text{Mo}_4\text{N}_{14.50}\text{O}_{8.25}\text{S}$ | $\text{C}_{79}\text{H}_{125}\text{Mo}_4\text{N}_{12}\text{O}_{16.75}\text{S}_{17.5}$ |
|                                              | 8                                                                           | 8                                                                                    | 0                                                                                    |
| M (g mol <sup>-1</sup> )                     | 1561.31                                                                     | 1541.84                                                                              | 2455.71                                                                              |
| Temperature                                  | 230                                                                         | 210                                                                                  | 220                                                                                  |
| Crystal system                               | Triclinic                                                                   | Triclinic                                                                            | Triclinic                                                                            |
| Space group                                  | <i>P</i> 1                                                                  | <i>P</i> 1                                                                           | <i>P</i> 1                                                                           |
| a (Å)                                        | 14.458(1)                                                                   | 14.7740(7)                                                                           | 15.1256(5)                                                                           |
| b (Å)                                        | 15.6676(9)                                                                  | 15.8521(7)                                                                           | 19.0607(6)                                                                           |
| c (Å)                                        | 16.4741(11)                                                                 | 17.0582(9)                                                                           | 21.7932(11)                                                                          |
| $\alpha$ (°)                                 | 88.655(3)                                                                   | 66.431(2)                                                                            | 91.701(3)                                                                            |
| $\beta$ (°)                                  | 73.617(3)                                                                   | 67.927(2)                                                                            | 95.393(3)                                                                            |
| $\gamma$ (°)                                 | 70.679(2)                                                                   | 68.124(2)                                                                            | 108.581(2)                                                                           |
| V (Å <sup>3</sup> )                          | 3368.5(4)                                                                   | 3275.0(3)                                                                            | 5917.4(4)                                                                            |
| Z                                            | 2                                                                           | 2                                                                                    | 2                                                                                    |
| D <sub>calc</sub>                            | 1.539                                                                       | 1.564                                                                                | 1.378                                                                                |
| Crystal size (mm)                            | 0.22 × 0.14 × 0.04                                                          | 0.24 × 0.16 × 0.12                                                                   | 0.30 × 0.06 × 0.04                                                                   |
| F(000)                                       | 1576                                                                        | 1560                                                                                 | 2530                                                                                 |
| $\mu(\text{Mo-K}\alpha)/\text{mm}^{-1}$      | 0.71073                                                                     | 0.71073                                                                              | 0.71073                                                                              |
| Reflections collected                        | 133440                                                                      | 185221                                                                               | 357366                                                                               |
| Independent reflections (I > 2 $\sigma$ (I)) | 16036                                                                       | 15880                                                                                | 22742                                                                                |
| Parameters                                   | 767                                                                         | 721                                                                                  | 1214                                                                                 |
| $\Delta(\rho)$ (e Å <sup>-3</sup> )          | 2.20 and -1.10                                                              | 1.18 and -0.80                                                                       | 1.79 and -1.74                                                                       |
| Goodness of fit                              | 1.08                                                                        | 1.10                                                                                 | 1.07                                                                                 |
| R1 <sup>a</sup>                              | 0.0665 (0.0984)                                                             | 0.0344 (0.0517)                                                                      | 0.0628 (0.077)                                                                       |
| wR2 <sup>a</sup>                             | 0.1874 (0.212)                                                              | 0.0851 (0.0982)                                                                      | 0.1759 (0.1972)                                                                      |

<sup>a</sup> $R = \sum ||F_o| - |F_c|| / \sum |F_o|$ ,  $wR_2 = [\sum w(F_o^2 - F_c^2)^2 / \sum w(F_o^2)^2]^{1/2}$ ;  $[F_o > 4\sigma(F_o)]$ . <sup>b</sup>Based on all data.

**Table S3: Selected angles ( $^{\circ}$ ) and distances ( $\text{\AA}$ ) in the complexes**

| complex                                               | phenoxy fragments plans, ( $^{\circ}$ ) | tert-butylphenyl fragments plans, ( $^{\circ}$ ) | Distance between aromatic fragments, ( $\text{\AA}$ ) | 4-atom cycle with Mo atoms plans, ( $^{\circ}$ ) |
|-------------------------------------------------------|-----------------------------------------|--------------------------------------------------|-------------------------------------------------------|--------------------------------------------------|
| $[\text{Mo}_2\text{O}_2\text{S}_2(\text{L}^1)]$       | 63.35                                   |                                                  | 7.361                                                 | 80.46                                            |
| $[\text{Mo}_2\text{O}_2\text{S}_2(\text{L}^2)]$       | 76.83                                   |                                                  | 7.828                                                 | 70.04                                            |
| $[\text{Mo}_2\text{O}_2\text{S}_2(\text{L}^3)]$       | 76.19                                   |                                                  | 7.865                                                 | 67.53                                            |
| $[(\text{Mo}_2\text{O}_2\text{S}_2)_2(\text{L}^4)_2]$ |                                         | 69.02                                            | 7.660                                                 | Mo1 and Mo2, 82.54<br>Mo3 and Mo4, 83.84         |
| $[(\text{Mo}_2\text{O}_2\text{S}_2)_2(\text{L}^5)_2]$ |                                         | 66.56                                            | 7.478                                                 | Mo1 and Mo2, 76.77<br>Mo3 and Mo4, 78.70         |
| $[(\text{Mo}_2\text{O}_2\text{S}_2)_2(\text{L}^6)_2]$ |                                         | 71.67                                            | 7.649                                                 | Mo1 and Mo2, 66.16<br>Mo3 and Mo4, 67.29         |

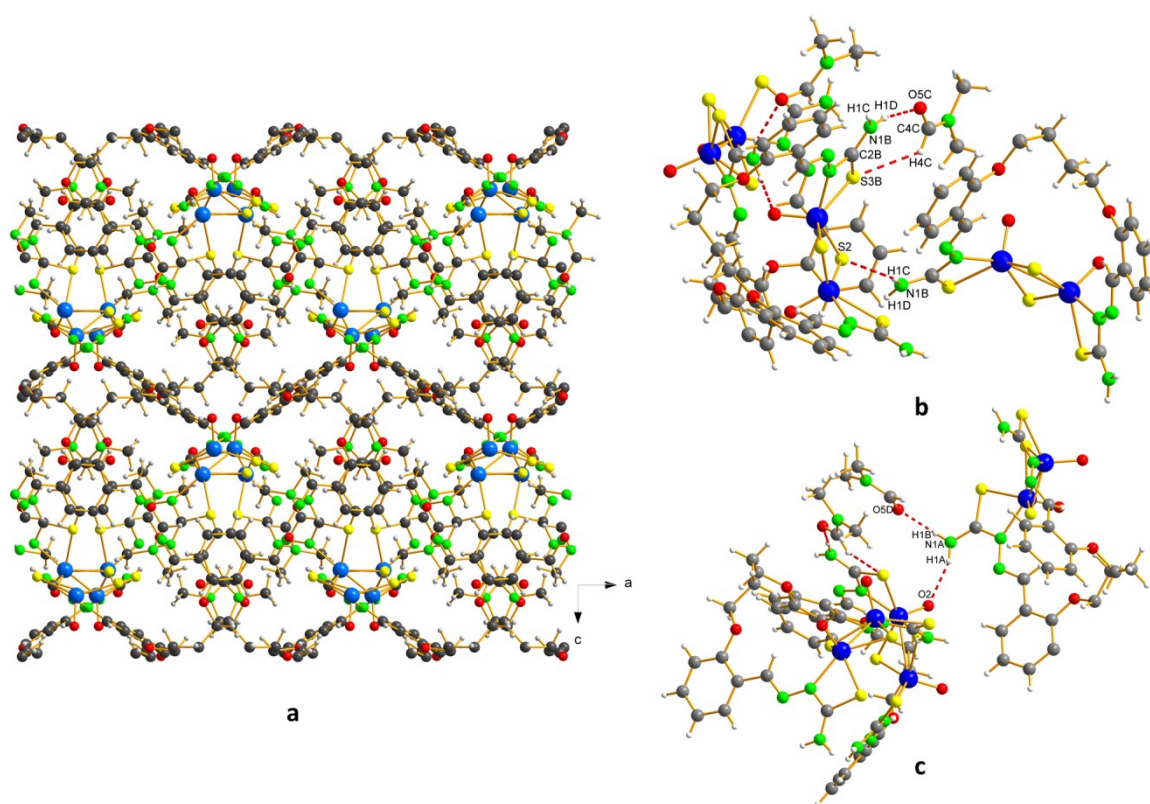

**Figure S6.** (a) Crystal packing of  $[\text{Mo}_2\text{O}_2\text{S}_2(\text{L}^1)]$  complex viewed along b axis; (b) and (c) intermolecular hydrogen bonding. Color code: Mo (blue), C (gray), O (red), N (green), and S (yellow).



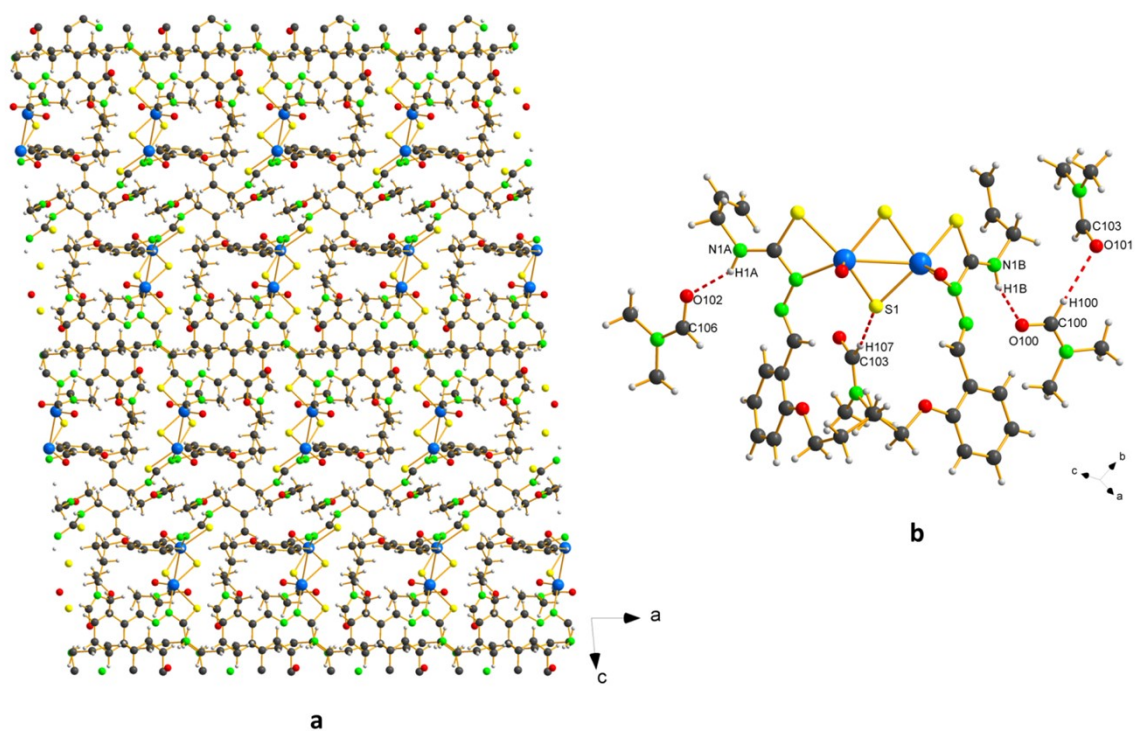

**Figure S7** (a) Crystal packing of  $[\text{Mo}_2\text{O}_2\text{S}_2(\text{L}^2)]$  complex viewed along  $b$  axis; (b) intermolecular hydrogen bonding. Color code: Mo (blue), C (gray), O (red), N (green), and S (yellow).

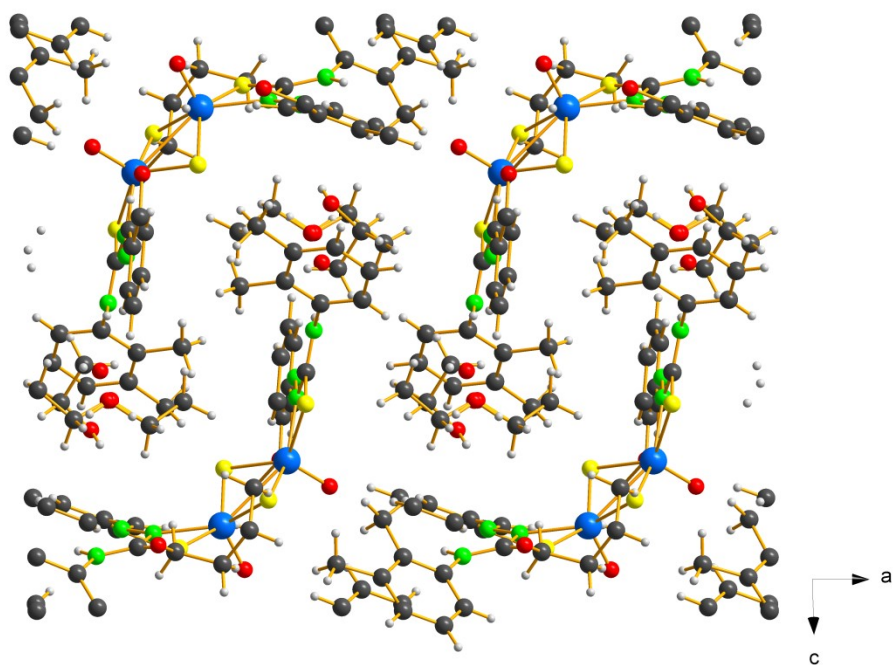

**Figure S8** Crystal packing of  $[\text{Mo}_2\text{O}_2\text{S}_2(\text{L}^3)]$  complex viewed along  $b$  axis. Color code: Mo (blue), C (gray), O (red), N (green), and S (yellow).

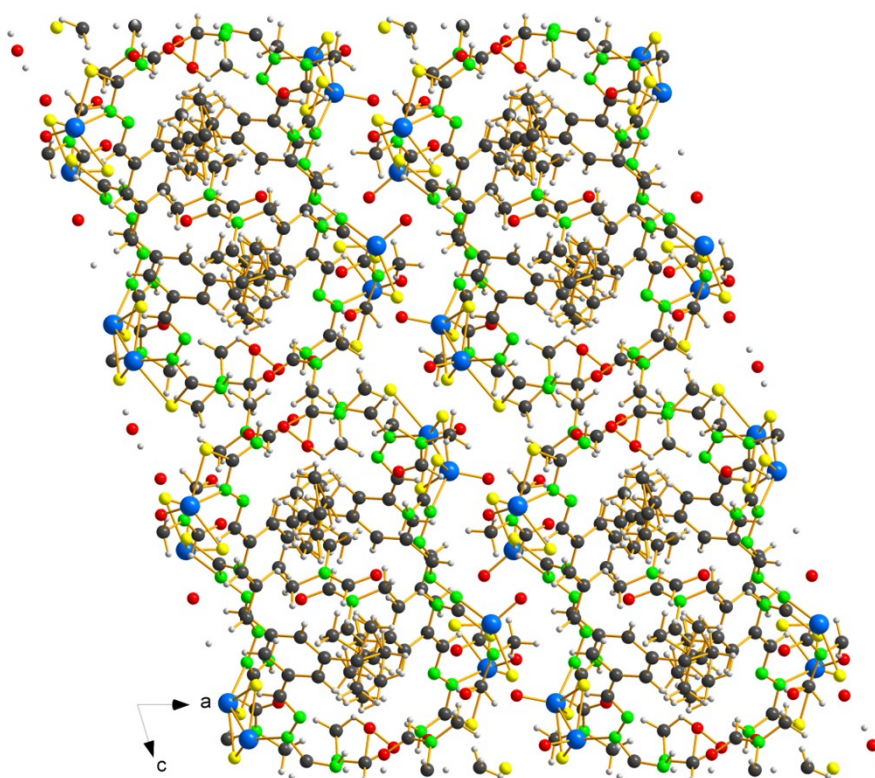

**Figure S9** Crystal packing of  $[(\text{Mo}_2\text{O}_2\text{S}_2)_2(\text{L}^4)_2]$  complex viewed along  $b$  axis. Color code: Mo (blue), C (gray), O (red), N (green), and S (yellow).

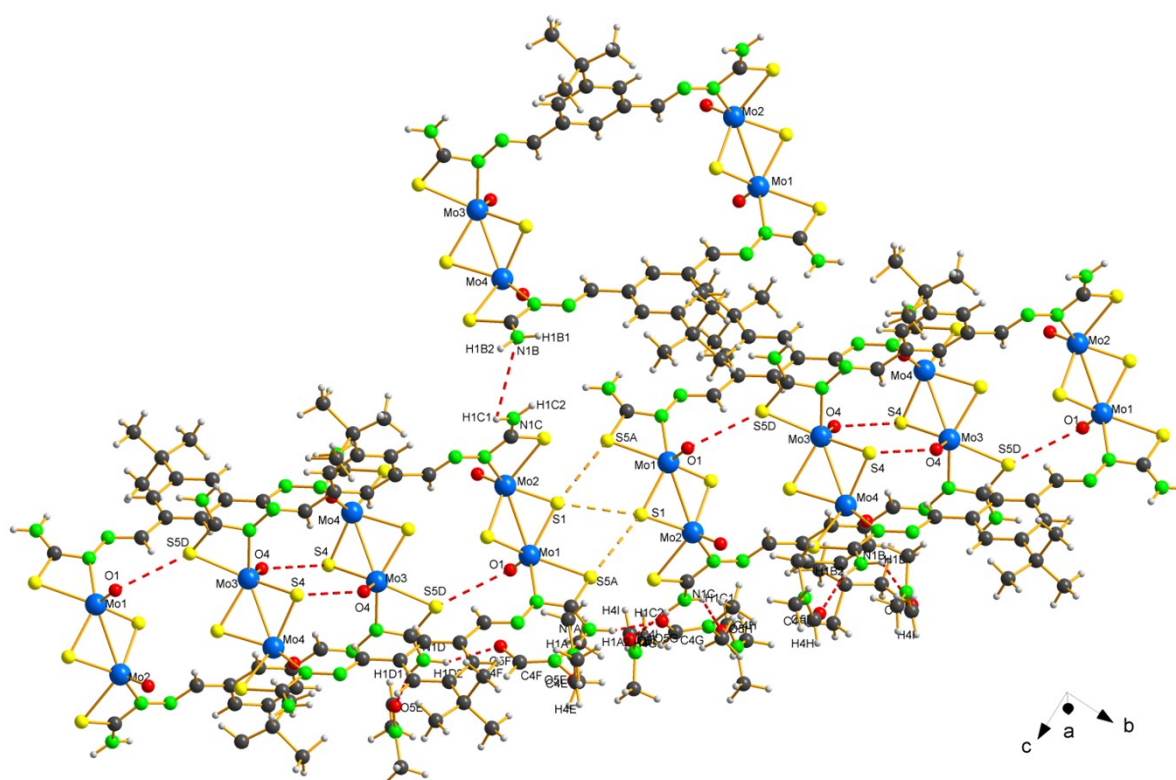

**Figure S10** Intermolecular S...O, S...S and N...H interactions in  $[(\text{Mo}_2\text{O}_2\text{S}_2)_2(\text{L}^4)_2]$ . Color code: Mo (blue), C (gray), O (red), N (green), and S (yellow).

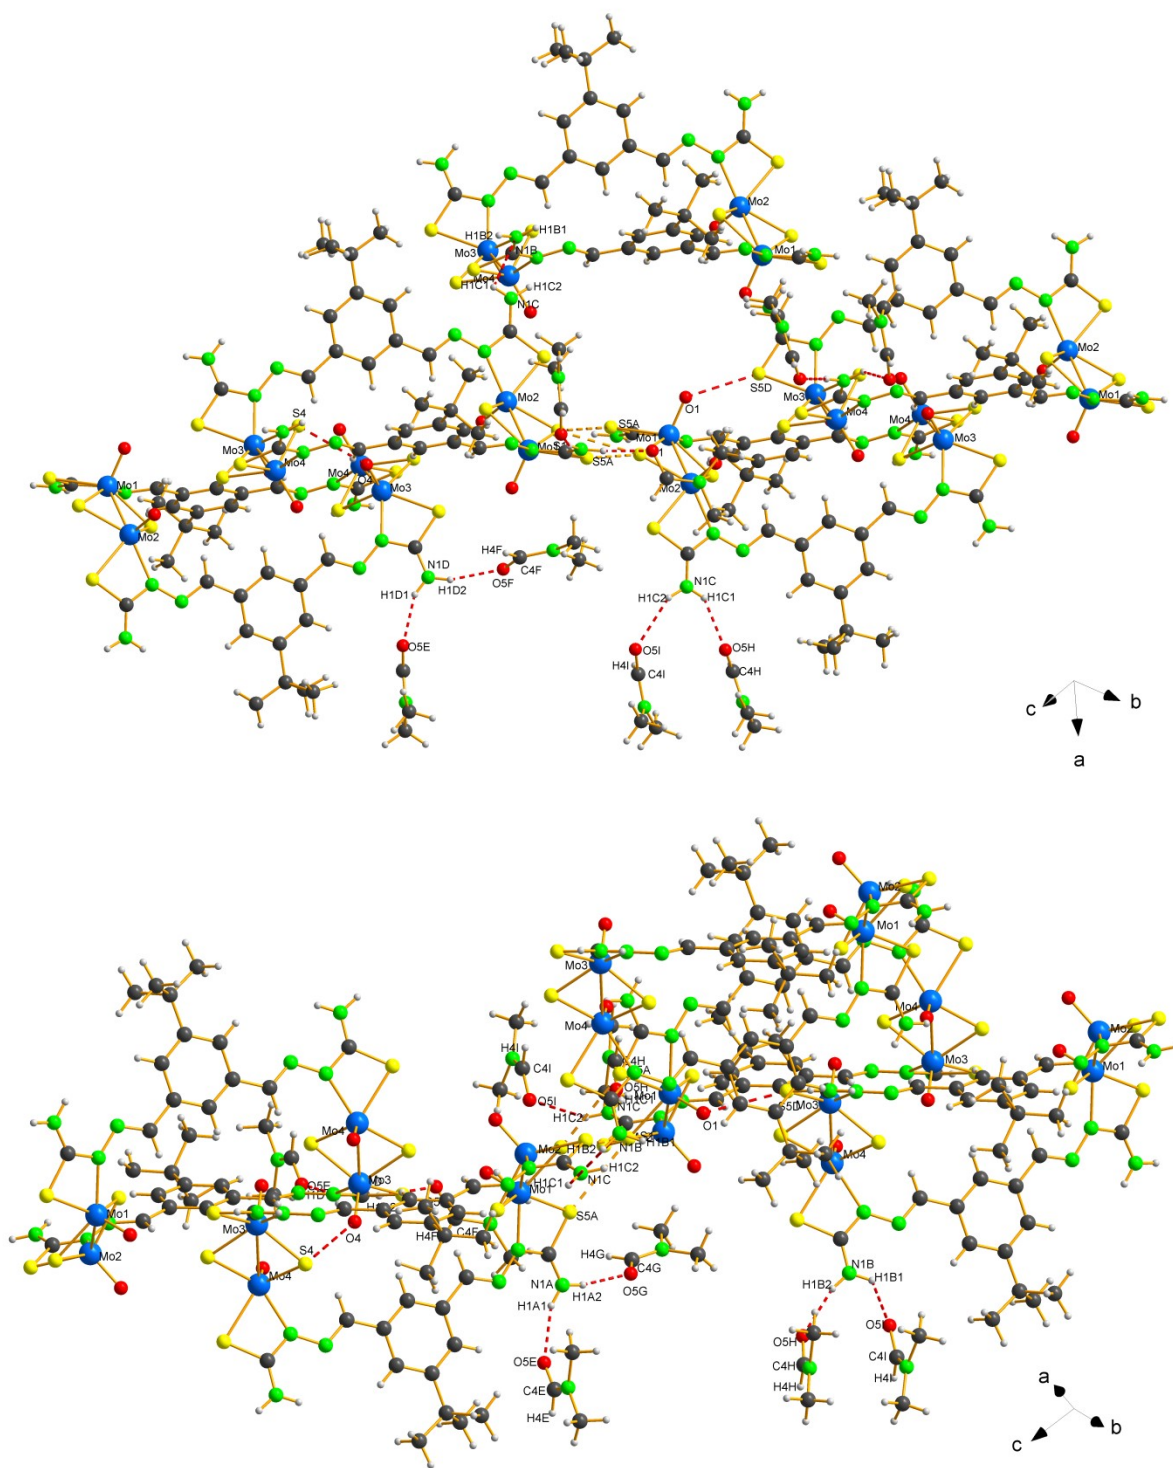

**Figure S11** Intermolecular NH...O hydrogen bonding in  $[(\text{Mo}_2\text{O}_2\text{S}_2)_2(\text{L}^4)_2]$  involving amino groups and DMF molecules. Color code: Mo (blue), C (gray), O (red), N (green), and S (yellow).



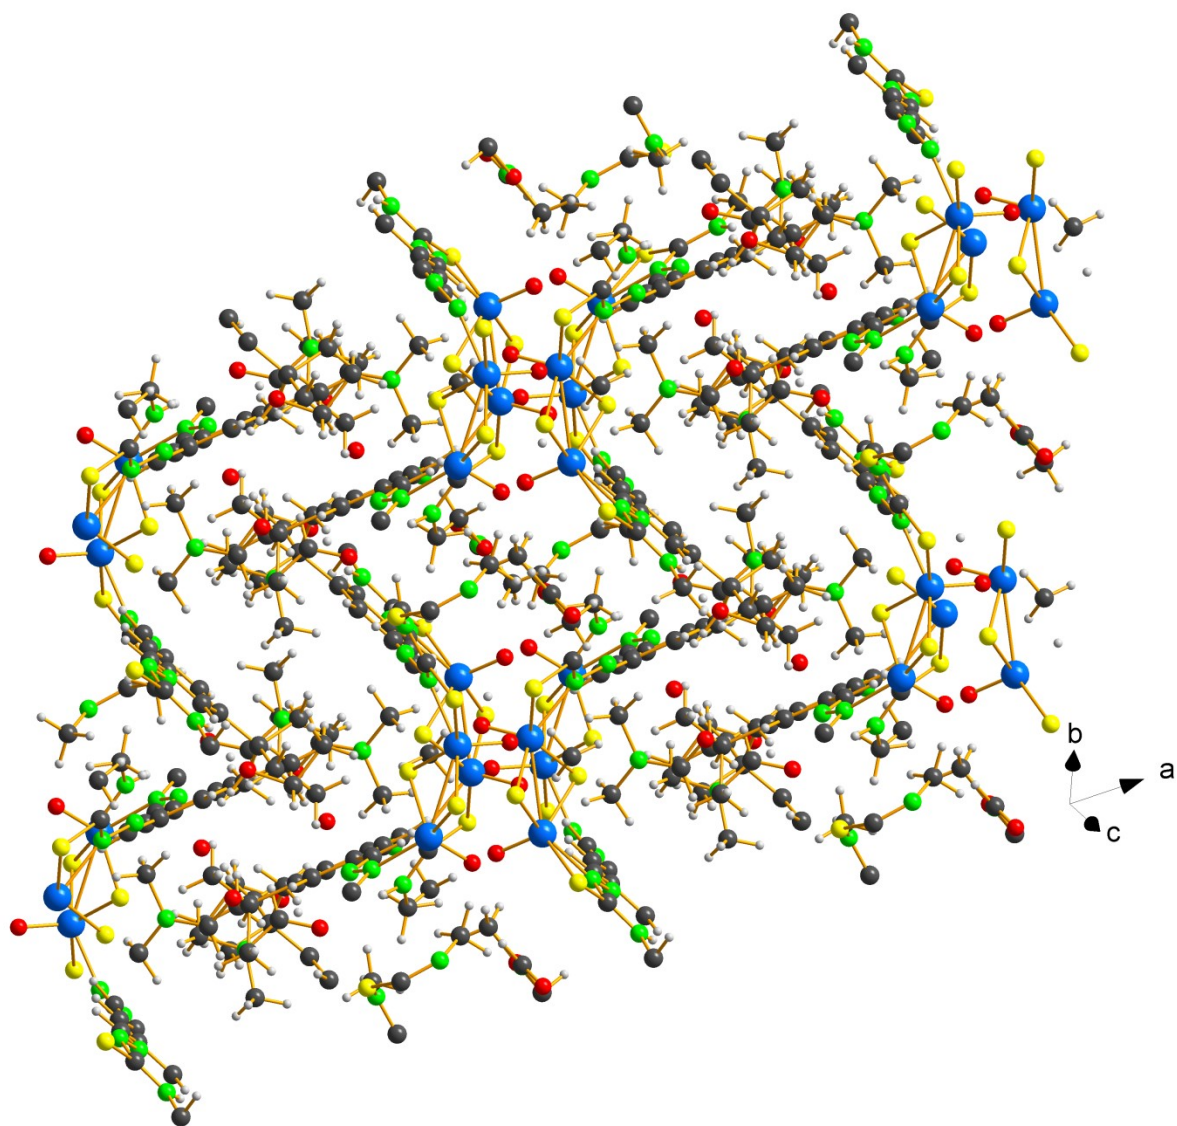

**Figure S12** Crystal packing of  $[(\text{Mo}_2\text{O}_2\text{S}_2)_2(\text{L}^5)_2]$  complex. Color code: Mo (blue), C (gray), O (red), N (green), and S (yellow).

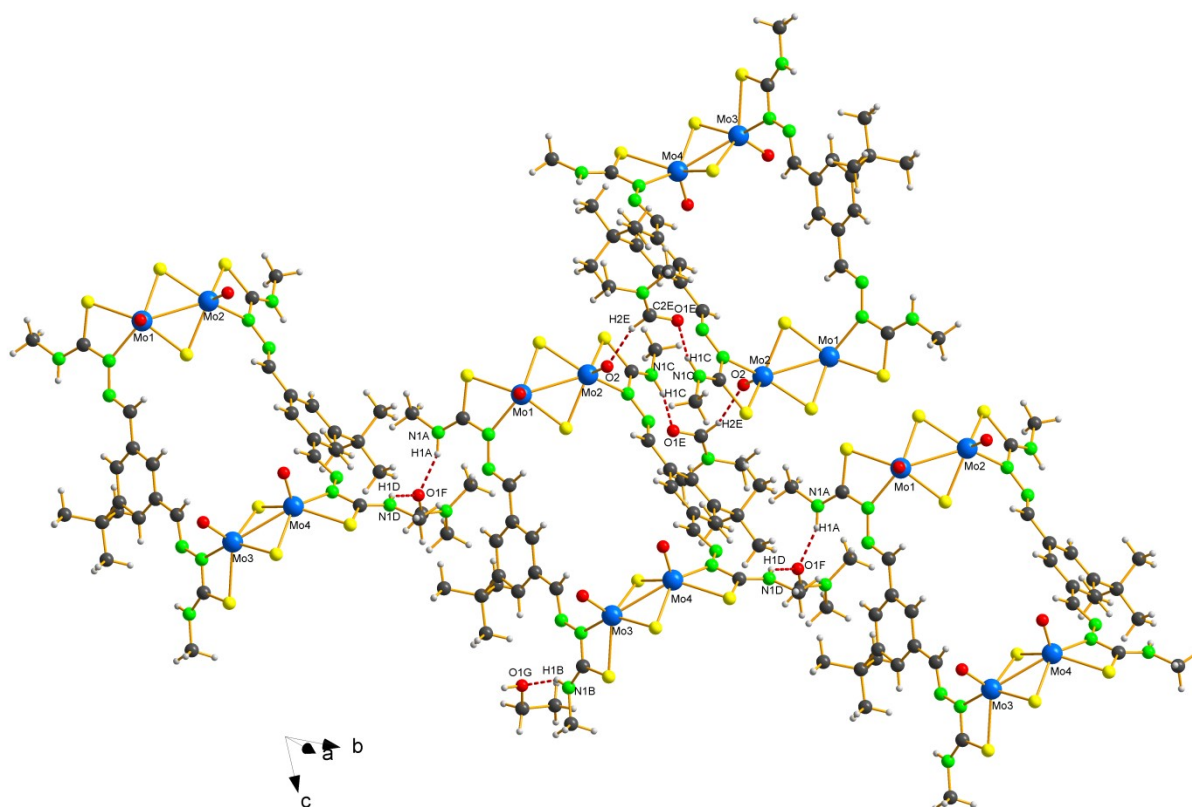

**Figure S13** Intermolecular NH...O hydrogen bonding in  $[(\text{Mo}_2\text{O}_2\text{S}_2)_2(\text{L}^5)_2]$  involving amino groups and DMF and EtOH molecules. Color code: Mo (blue), C (gray), O (red), N (green), and S (yellow).

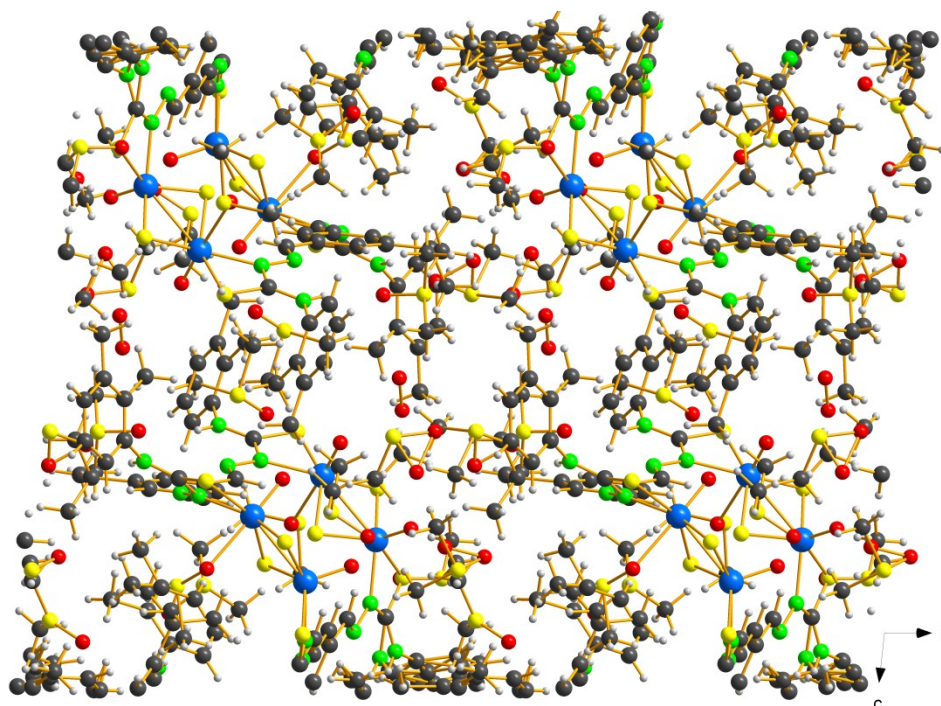

**Figure S14** Crystal packing of  $[(\text{Mo}_2\text{O}_2\text{S}_2)_2(\text{L}^6)_2]$  complex viewed along  $b$  axis. Color code: Mo (blue), C (gray), O (red), N (green), and S (yellow).

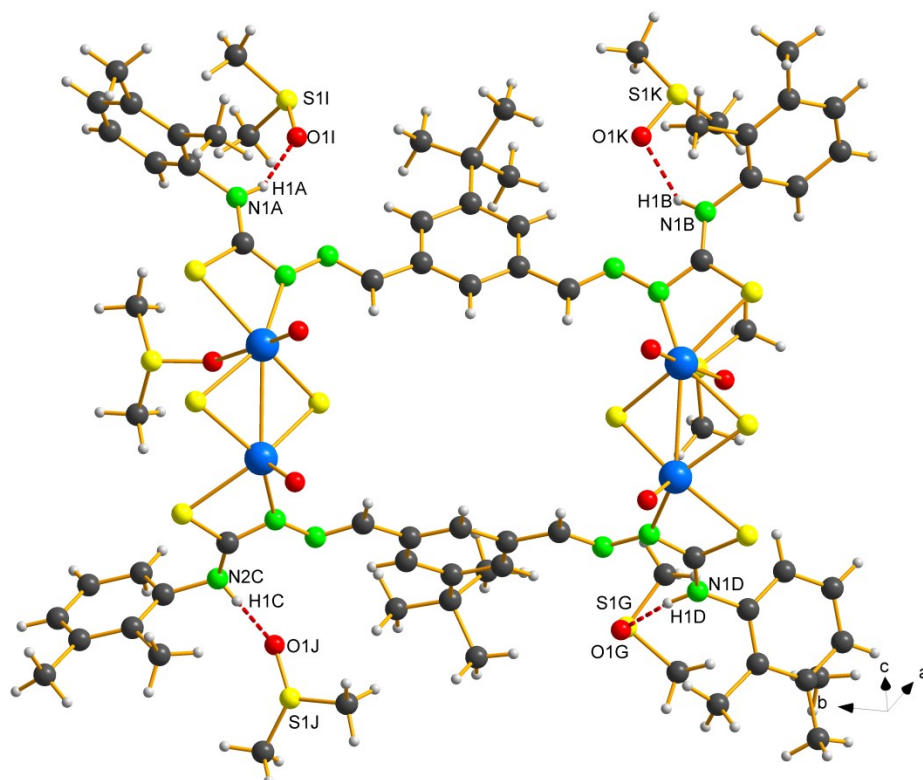

**Figure S15** Intermolecular  $\text{NH}\cdots\text{O}$  hydrogen bonding in  $[(\text{Mo}_2\text{O}_2\text{S}_2)_2(\text{L}^6)_2]$  involving amino groups and DMF molecules. Color code: Mo (blue), C (gray), O (red), N (green), and S (yellow).

## Part 3: NMR studies

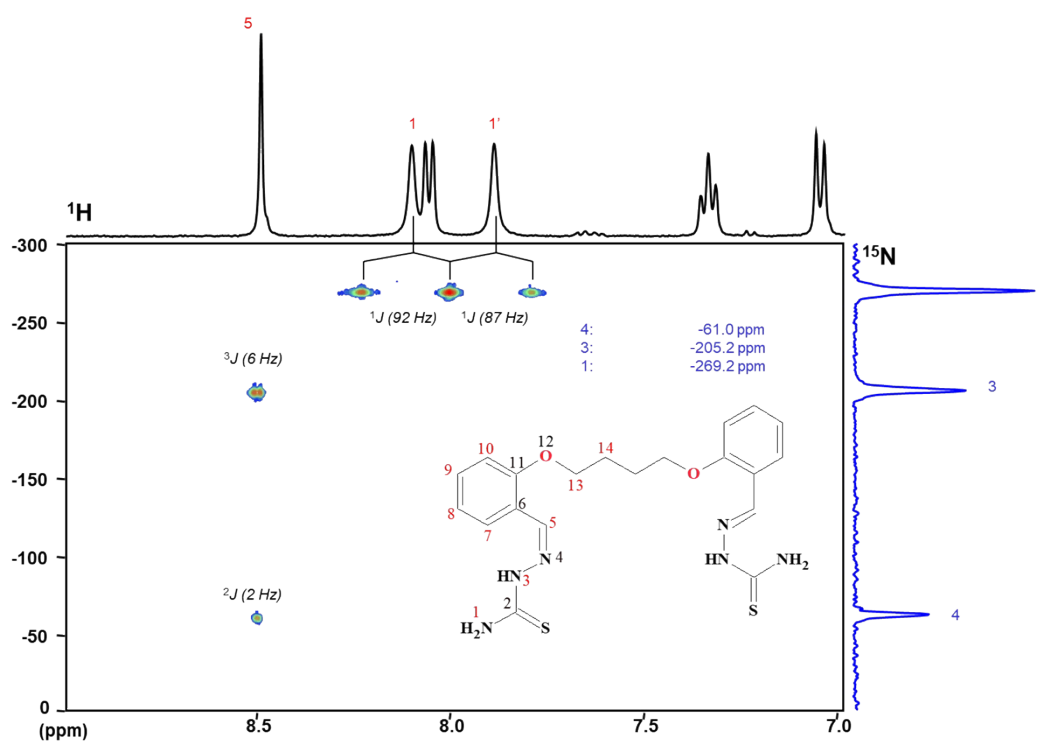

Figure S16  $^{15}\text{N}\{^1\text{H}\}$  NMR HMBC spectrum for  $\text{H}_2\text{L}^1$  ligand

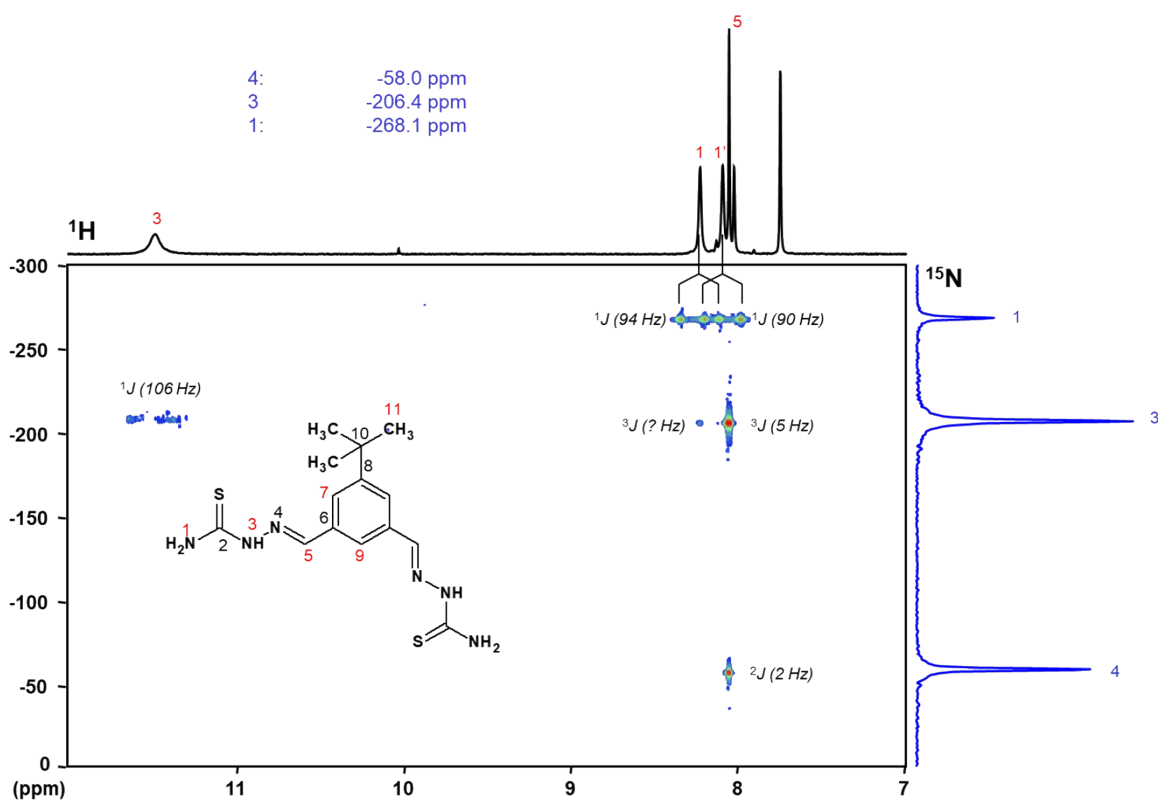

Figure S17  $^{15}\text{N}\{^1\text{H}\}$  NMR HMBC spectrum for  $\text{H}_2\text{L}^4$  ligand

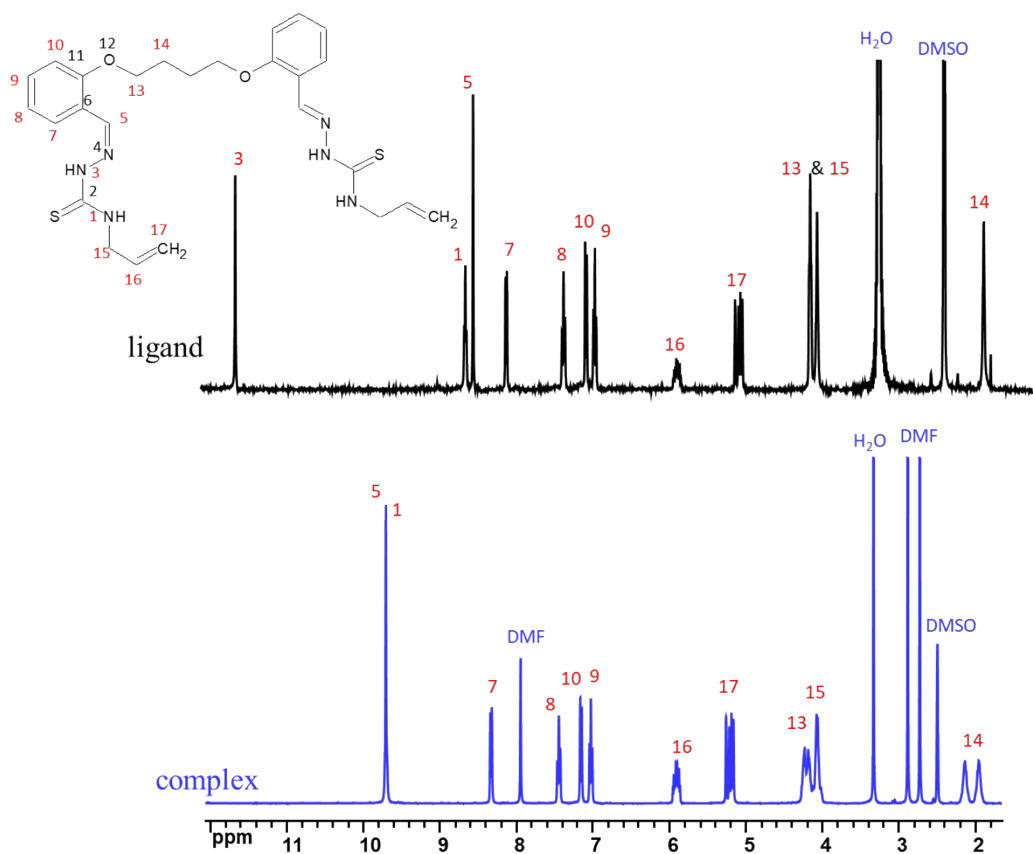

Figure S18  $^1\text{H-NMR}$  spectra of  $\text{H}_2\text{L}^2$  and  $[\text{Mo}_2\text{O}_2\text{S}_2(\text{L}^2)]$  complex

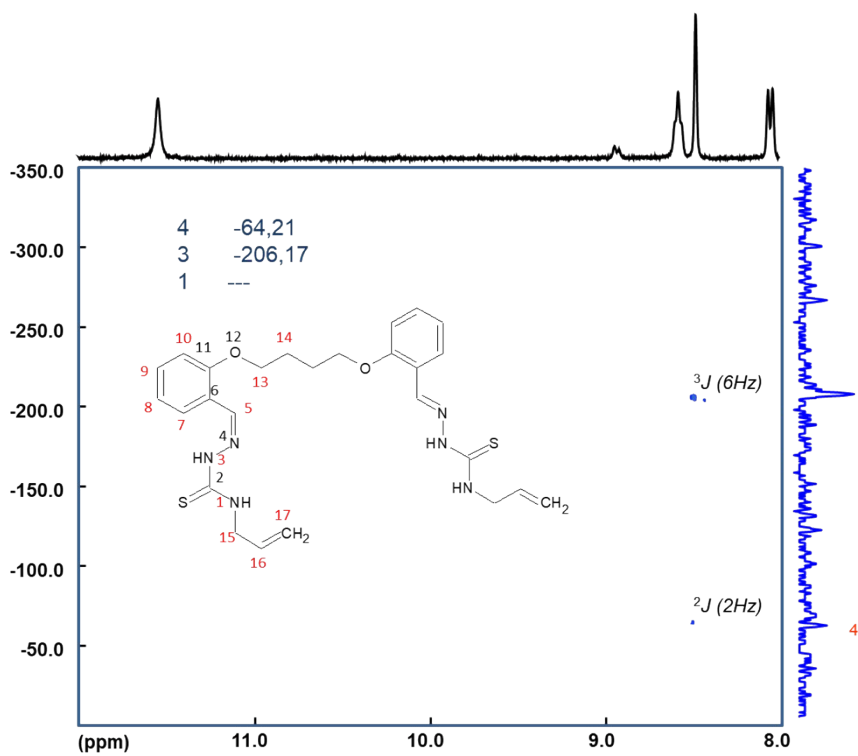

Figure S19  $^1\text{H-NMR}$  DOSY spectrum for  $\text{H}_2\text{L}^2$  ligand



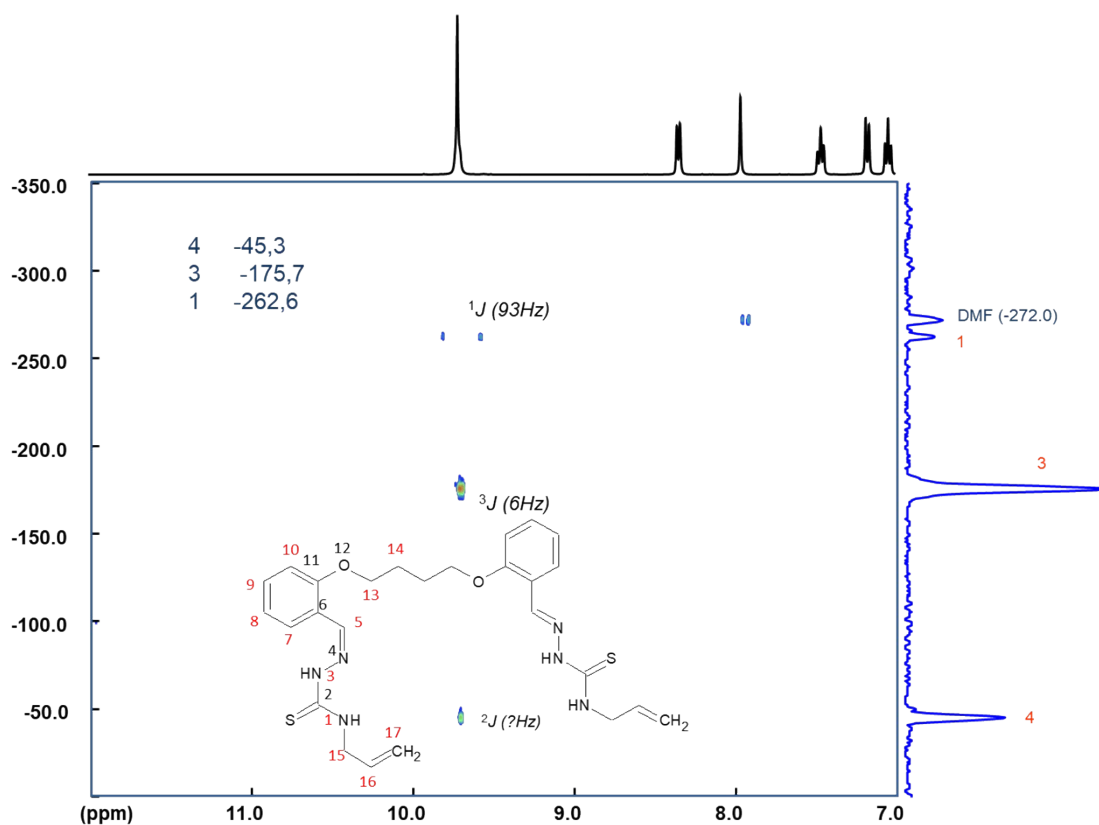

Figure S20  $^{15}\text{N}\{^1\text{H}\}$  NMR HMBC spectrum for  $\text{H}_2\text{L}^2$  ligand

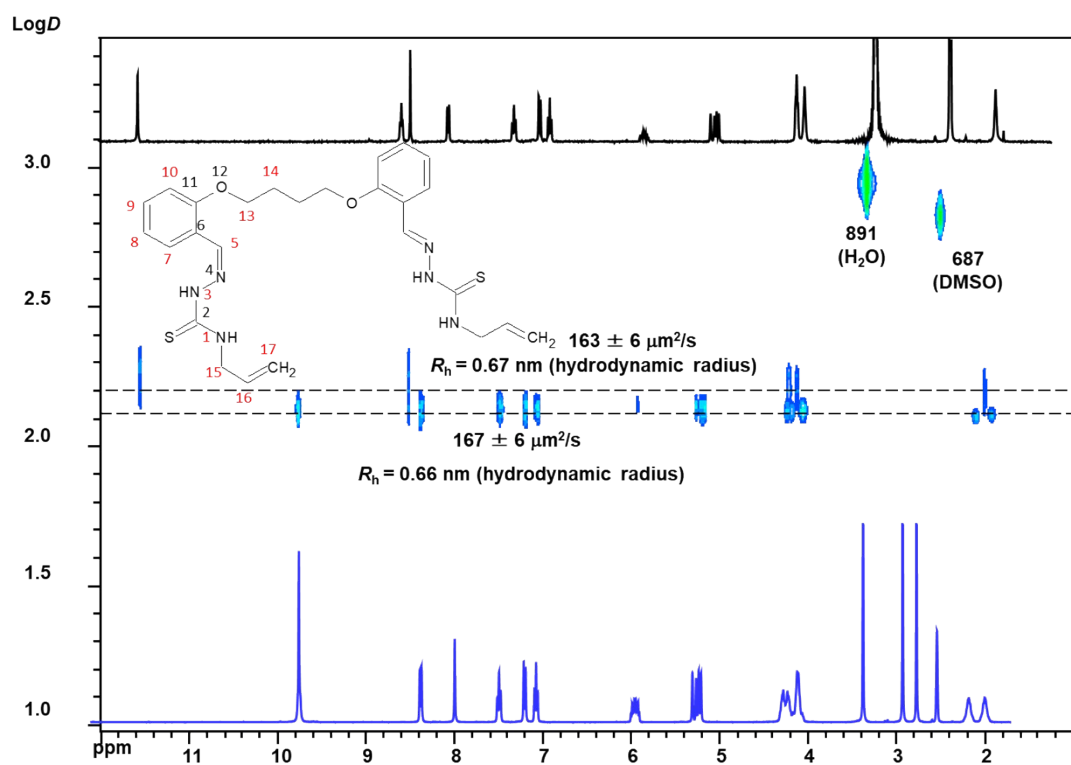

Figure S21  $^1\text{H}$ -NMR DOSY spectra for  $\text{H}_2\text{L}^2$  (top) and  $[\text{Mo}_2\text{O}_2\text{S}_2(\text{L}^2)]$  complex (bottom)

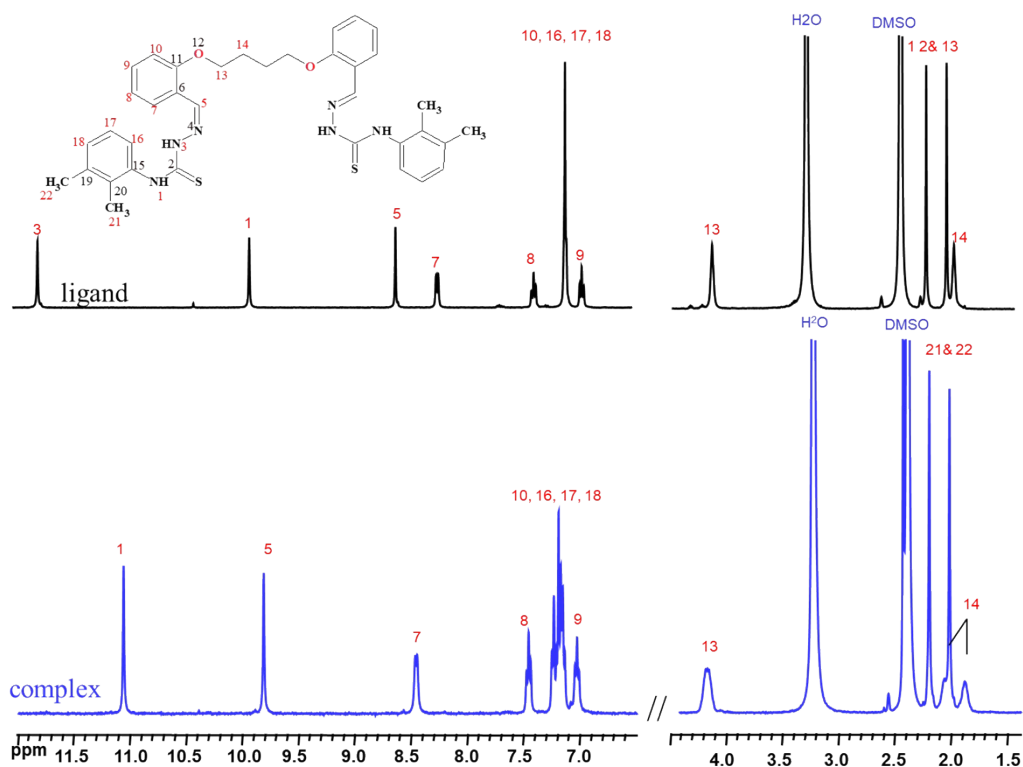

Figure S22  $^1\text{H}$ -NMR spectra of  $\text{H}_2\text{L}^3$  and  $[\text{Mo}_2\text{O}_2\text{S}_2(\text{L}^3)]$  complex

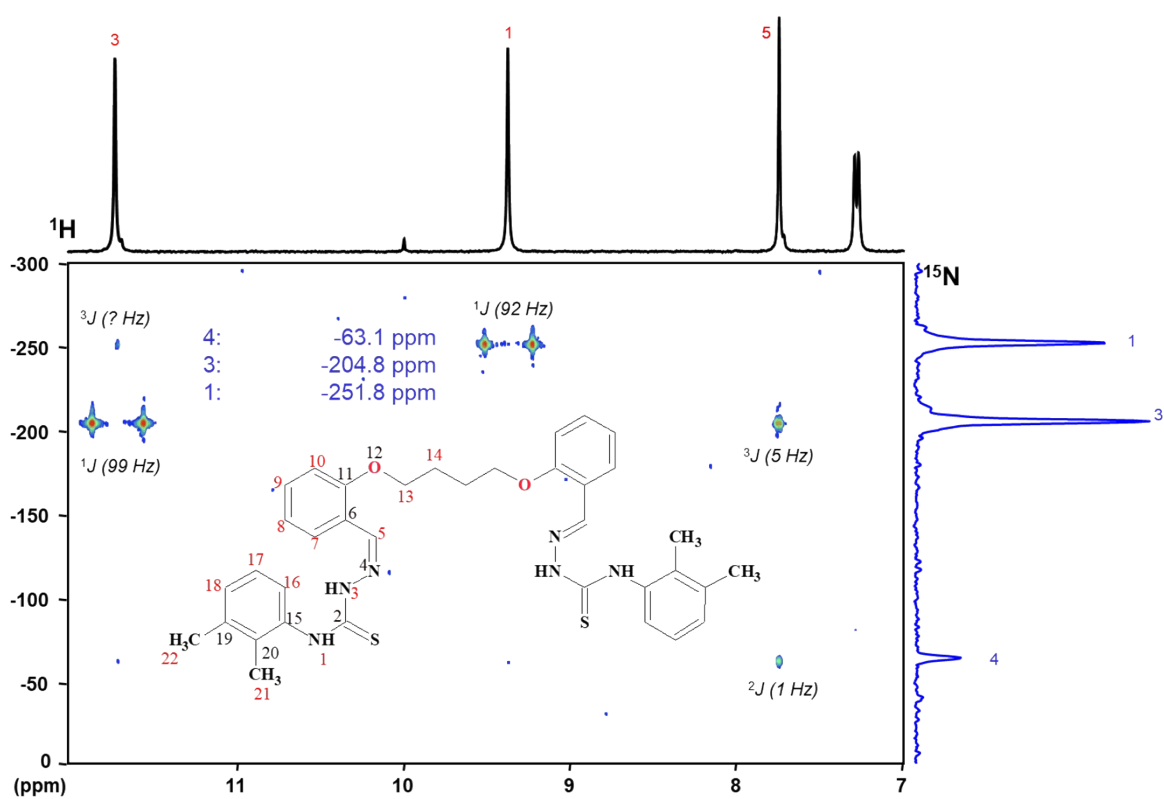

Figure S23  $^{15}\text{N}\{^1\text{H}\}$  NMR HMBC spectrum for  $\text{H}_2\text{L}^3$  ligand

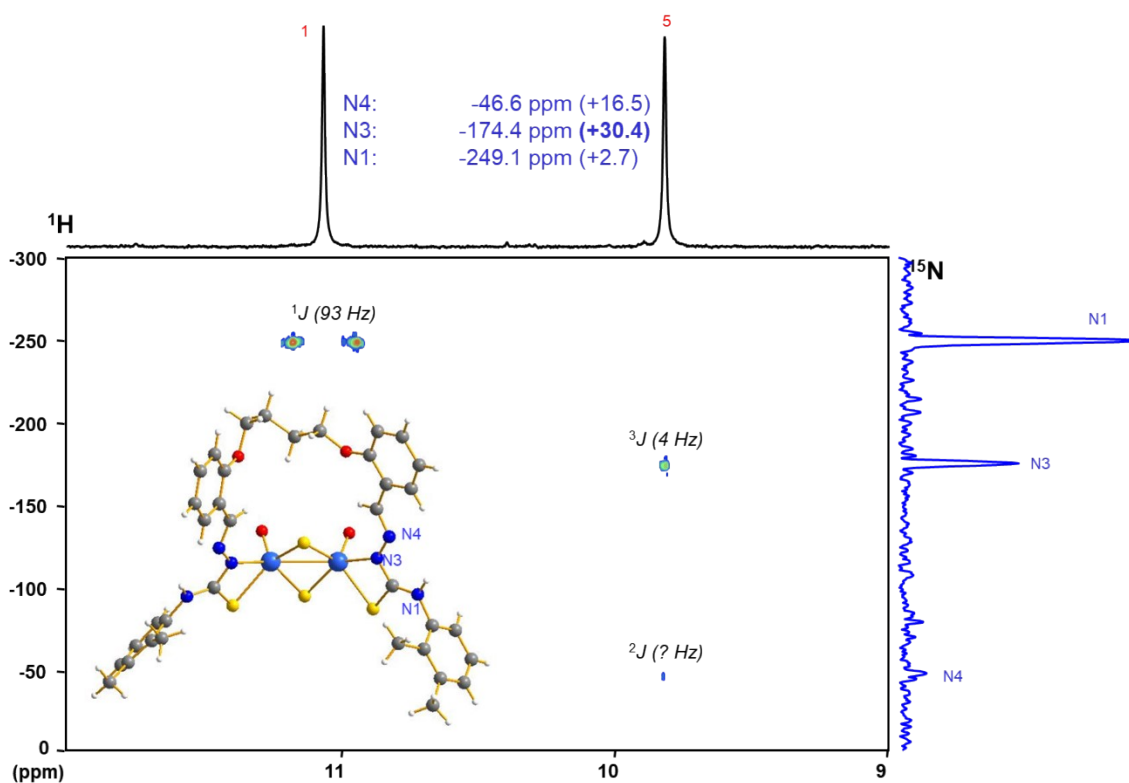

**Figure S24**  $^{15}\text{N}\{^1\text{H}\}$  NMR HMBC spectrum for  $[\text{Mo}_2\text{O}_2\text{S}_2(\text{L}^3)]$  complex

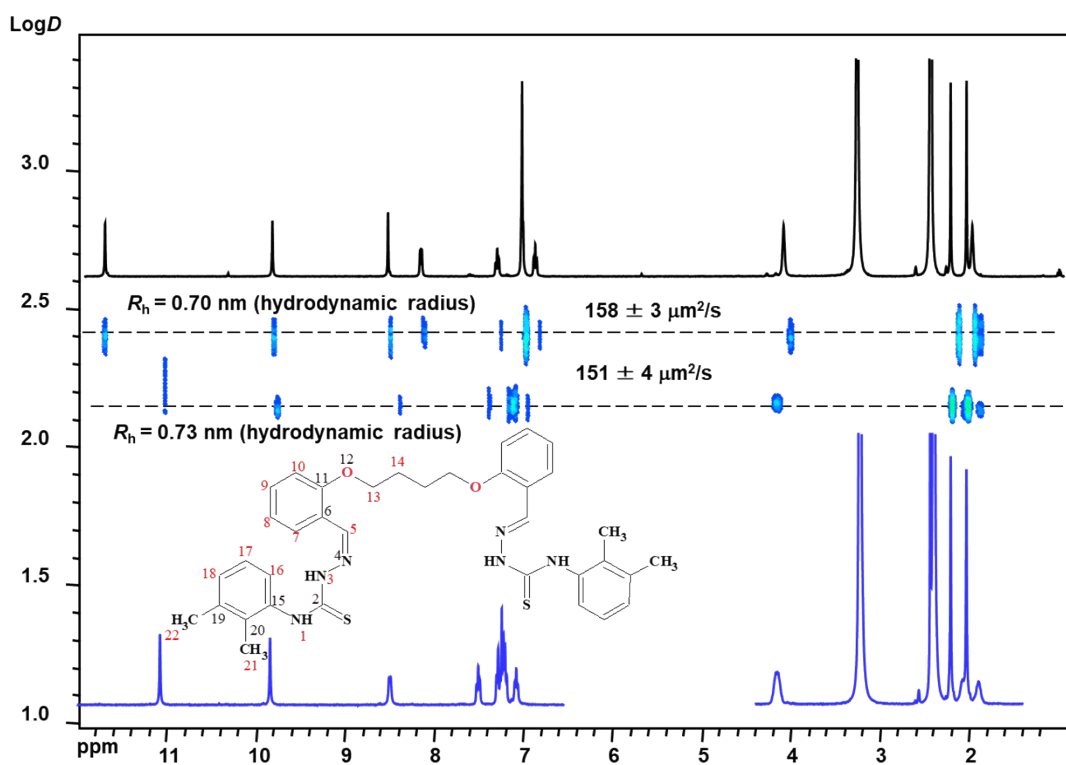

**Figure S25**  $^1\text{H}$ -NMR DOSY spectra for  $\text{H}_2\text{L}^2$  (top) and  $[\text{Mo}_2\text{O}_2\text{S}_2(\text{L}^3)]$  complex (bottom)

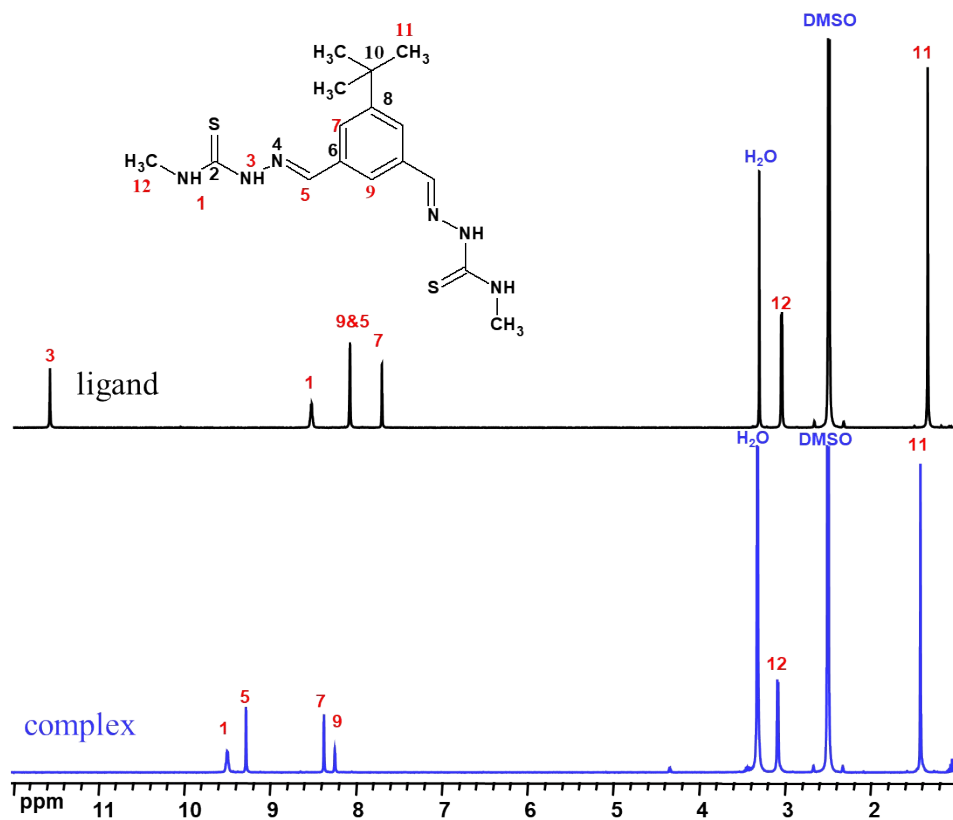

Figure S26  $^1\text{H-NMR}$  spectra of  $\text{H}_2\text{L}^5$  and  $[(\text{Mo}_2\text{O}_2\text{S}_2)_2(\text{L}^5)_2]$  complex

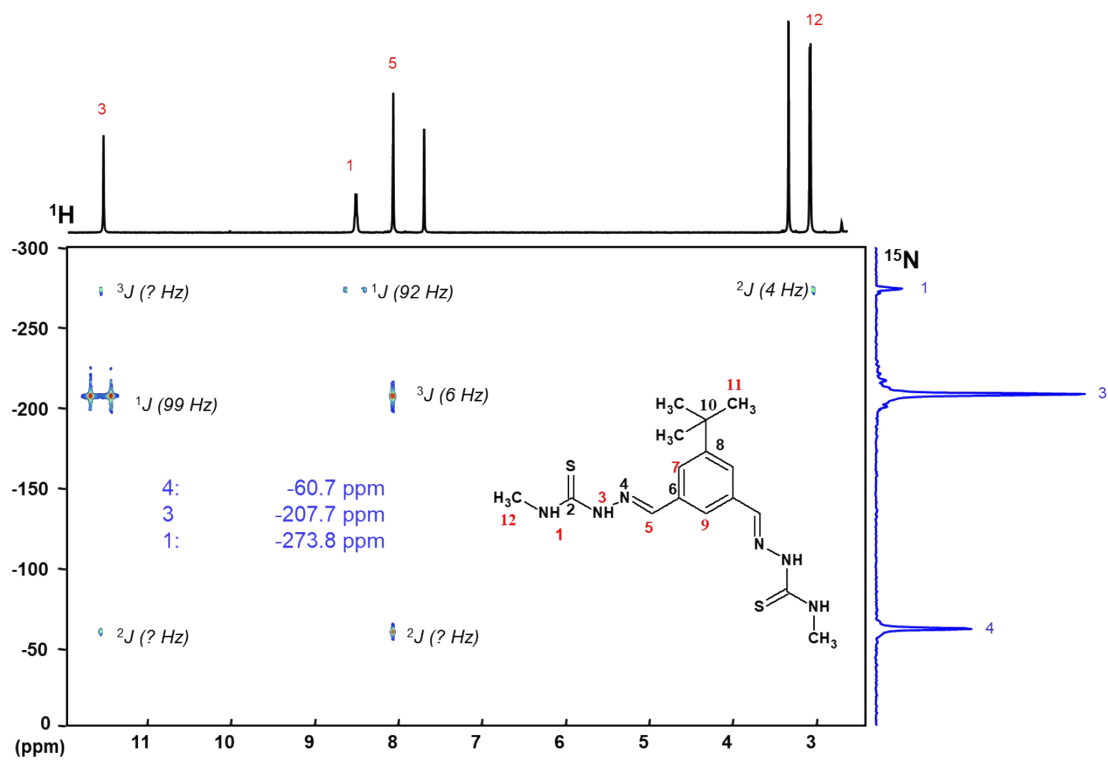

Figure S27  $^{15}\text{N}\{^1\text{H}\}$  NMR HMBC spectrum for  $\text{H}_2\text{L}^5$

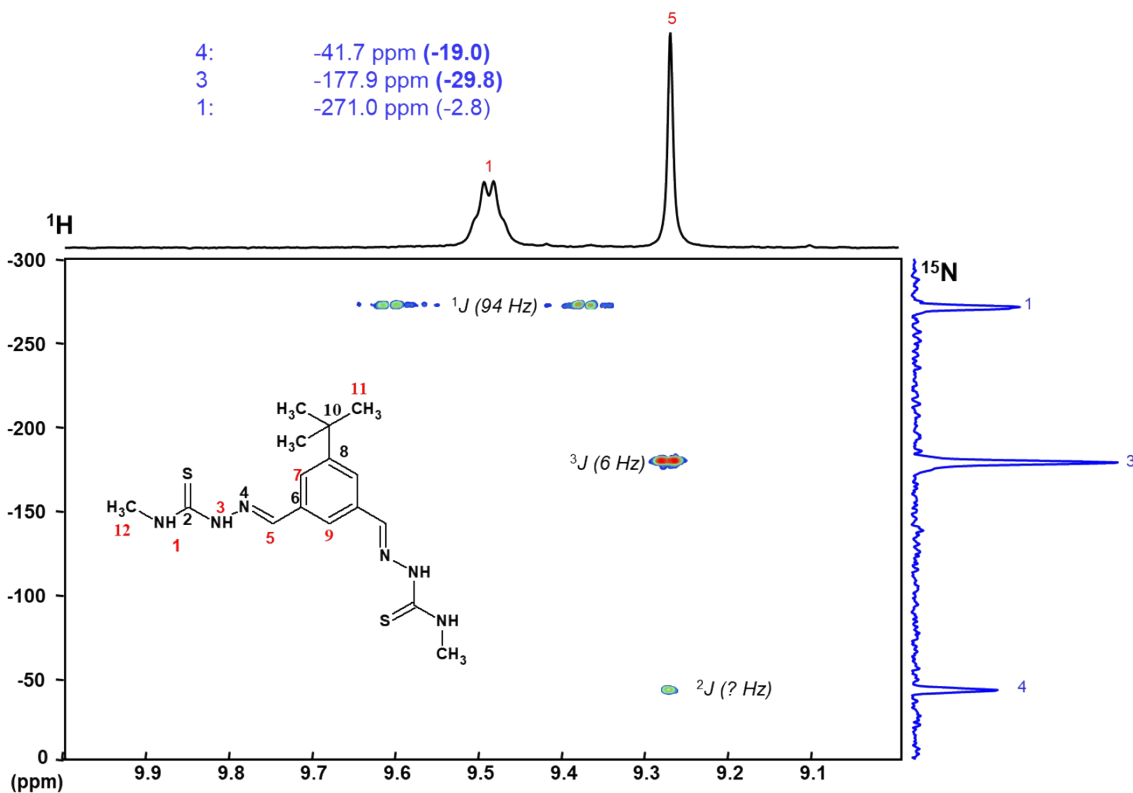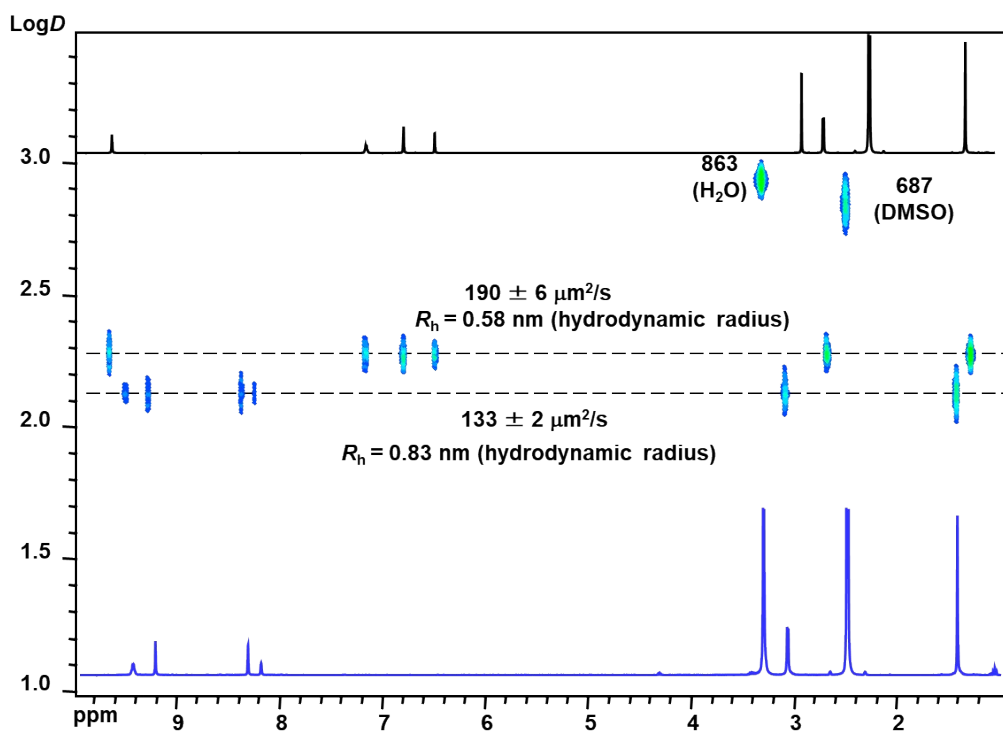

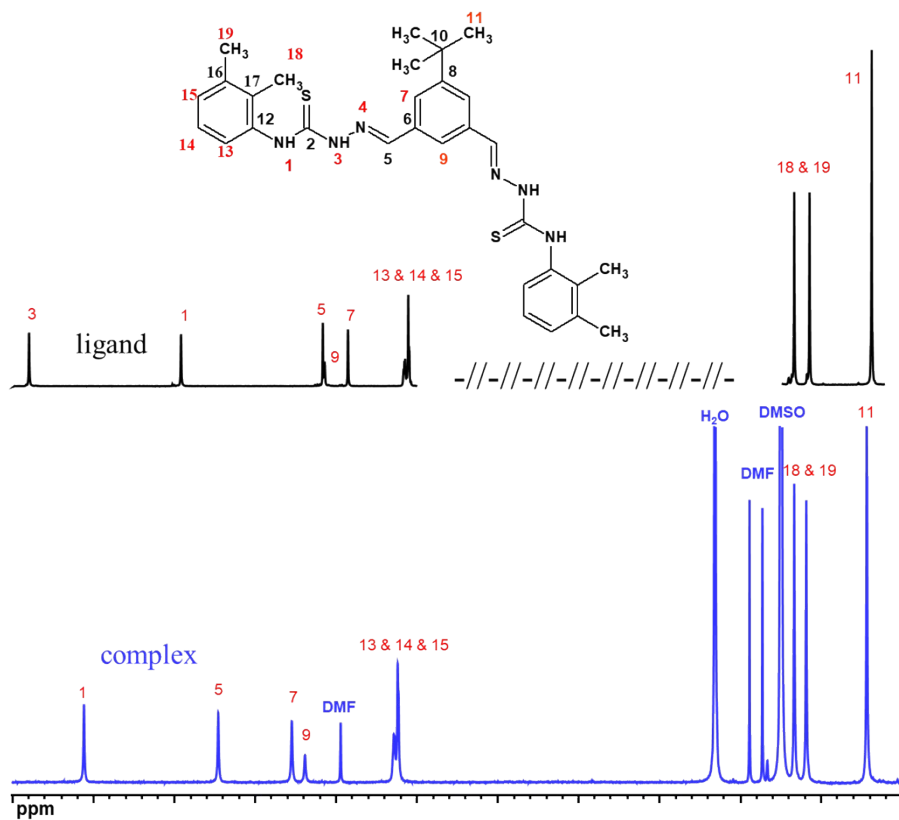

Figure S30  $^1\text{H}$ -NMR spectra of  $\text{H}_2\text{L}^6$  and  $[(\text{Mo}_2\text{O}_2\text{S}_2)_2(\text{L}^6)_2]$  complex

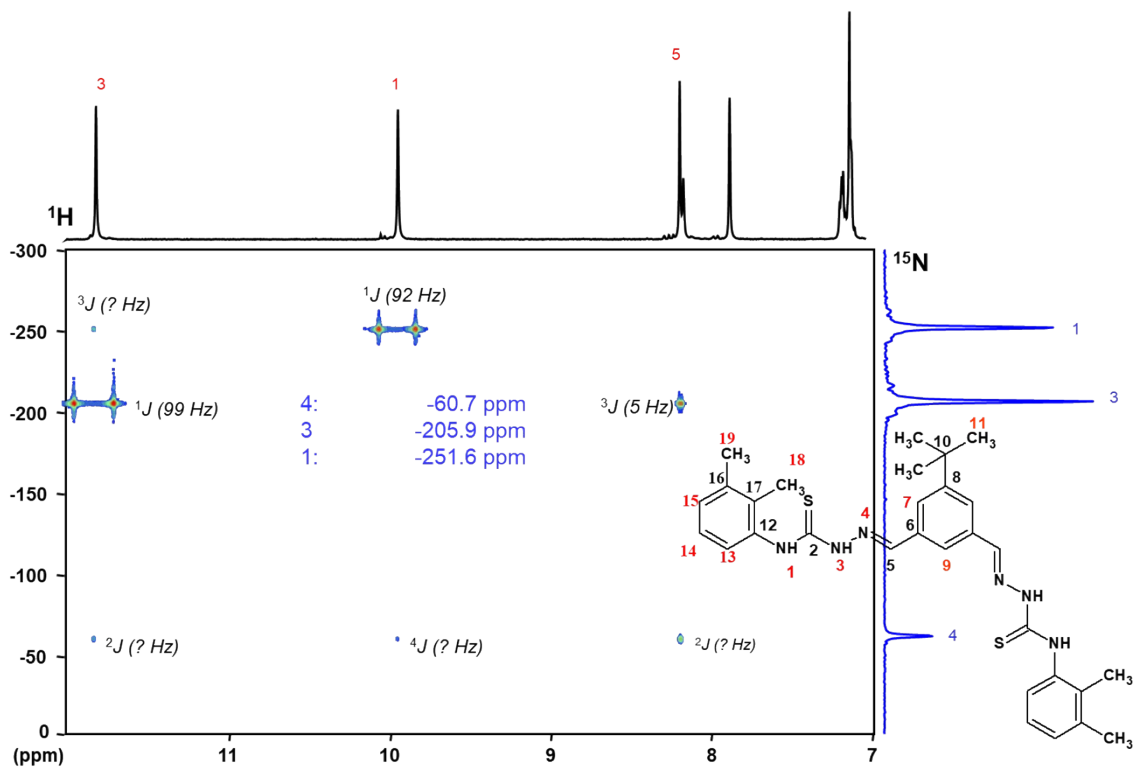

Figure S31  $^{15}\text{N}\{^1\text{H}\}$  NMR HMBC spectrum for  $\text{H}_2\text{L}^6$  ligand

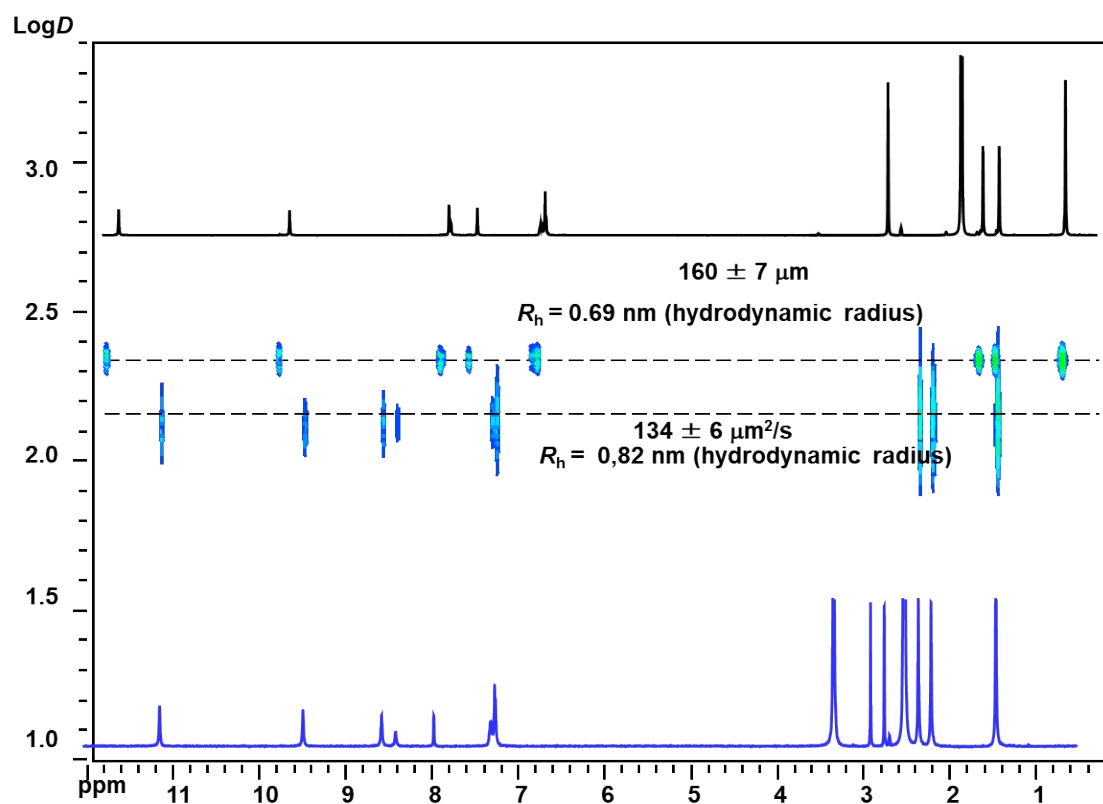

**Figure S32** <sup>1</sup>H-NMR DOSY spectra for H<sub>2</sub>L<sup>6</sup> (top) and [(Mo<sub>2</sub>O<sub>2</sub>S<sub>2</sub>)<sub>2</sub>(L<sup>6</sup>)<sub>2</sub>] complex (bottom)
